# Supplementary material
Source: PubMed Central journal article supplement (PMC2984665)

## **Sebestenoids A-D, BACE1 inhibitors from *Cordia sebestena***

Jingqiu Dai<sup>a</sup>, Analia Sorribas<sup>a</sup>, Wesley Y. Yoshida<sup>a</sup>, and Philip G. Williams<sup>a,b,\*</sup>

<sup>a</sup> *Department of Chemistry, University of Hawaii at Manoa, Honolulu, Hawaii, USA, 96822*

<sup>b</sup> *The Cancer Research Center of Hawaii, 651 Ilalo Street, Honolulu, Hawaii, USA, 96813*

\*Corresponding author. Tel. +1 808 956 5720; Fax: +1 808 956 5908. *E-Mail address:* [philipwi@hawaii.edu](mailto:philipwi@hawaii.edu) (P.G. Williams)

| <b>List of Supporting Information</b>                                                                  | <b>Page</b> |
|--------------------------------------------------------------------------------------------------------|-------------|
| Table S1 NMR Spectroscopic Data (500 MHz) in MeOH- <i>d</i> <sub>4</sub> for Sebestenoid A (1)         | 3           |
| Table S2 NMR Spectroscopic Data (500 MHz) in MeOH- <i>d</i> <sub>4</sub> for Sebestenoid B (2)         | 4           |
| Table S3 NMR Spectroscopic Data (500 MHz) in MeOH- <i>d</i> <sub>4</sub> for Sebestenoid C (3)         | 5           |
| Table S4 NMR Spectroscopic Data (500 MHz) in MeOH- <i>d</i> <sub>4</sub> for Sebestenoid D (4)         | 6           |
| Figure S1 <sup>1</sup> H-NMR spectrum of Sebestenoid A (1) (MeOH- <i>d</i> <sub>4</sub> , 500 MHz)     | 7           |
| Figure S2 <sup>13</sup> C-NMR spectrum of Sebestenoid A (1) (MeOH- <i>d</i> <sub>4</sub> , 125 MHz)    | 8           |
| Figure S3 COSY NMR spectrum of Sebestenoid A (1) (MeOH- <i>d</i> <sub>4</sub> , 500 MHz)               | 9           |
| Figure S4 HSQC NMR spectrum of Sebestenoid A (1) (MeOH- <i>d</i> <sub>4</sub> , 500 MHz)               | 10          |
| Figure S5 Expansion of HSQC NMR spectrum of Sebestenoid A (1) (MeOH- <i>d</i> <sub>4</sub> , 500 MHz)  | 11          |
| Figure S6 HMBC NMR spectrum of Sebestenoid A (1) (MeOH- <i>d</i> <sub>4</sub> , 500 MHz)               | 12          |
| Figure S7 ROESY NMR spectrum of Sebestenoid A (1) (MeOH- <i>d</i> <sub>4</sub> , 500 MHz)              | 13          |
| Figure S8 <sup>1</sup> H-NMR spectrum of Sebestenoid B (2) (MeOH- <i>d</i> <sub>4</sub> , 500 MHz)     | 14          |
| Figure S9 <sup>13</sup> C-NMR spectrum of Sebestenoid B (2) (MeOH- <i>d</i> <sub>4</sub> , 125 MHz)    | 15          |
| Figure S10 COSY NMR spectrum of Sebestenoid B (2) (MeOH- <i>d</i> <sub>4</sub> , 500 MHz)              | 16          |
| Figure S11 HSQC NMR spectrum of Sebestenoid B (2) (MeOH- <i>d</i> <sub>4</sub> , 500 MHz)              | 17          |
| Figure S12 HMBC NMR spectrum of Sebestenoid B (2) (MeOH- <i>d</i> <sub>4</sub> , 500 MHz)              | 18          |
| Figure S13 ROESY NMR spectrum of Sebestenoid B (2) (MeOH- <i>d</i> <sub>4</sub> , 500 MHz)             | 19          |
| Figure S14 <sup>1</sup> H-NMR spectrum of Sebestenoid C (3) (MeOH- <i>d</i> <sub>4</sub> , 500 MHz)    | 20          |
| Figure S15 <sup>13</sup> C-NMR spectrum of Sebestenoid C (3) (MeOH- <i>d</i> <sub>4</sub> , 125 MHz)   | 21          |
| Figure S16 COSY NMR spectrum of Sebestenoid C (3) (MeOH- <i>d</i> <sub>4</sub> , 500 MHz)              | 22          |
| Figure S17 HSQC NMR spectrum of Sebestenoid C (3) (MeOH- <i>d</i> <sub>4</sub> , 500 MHz)              | 23          |
| Figure S18 Expansion of HSQC NMR spectrum of Sebestenoid C (3) (MeOH- <i>d</i> <sub>4</sub> , 500 MHz) | 24          |
| Figure S19 HMBC NMR spectrum of Sebestenoid C (3) (MeOH- <i>d</i> <sub>4</sub> , 500 MHz)              | 25          |
| Figure S20 ROESY NMR spectrum of Sebestenoid C (3) (MeOH- <i>d</i> <sub>4</sub> , 500 MHz)             | 26          |
| Figure S21 <sup>1</sup> H-NMR spectrum of Sebestenoid D (4) (MeOH- <i>d</i> <sub>4</sub> , 500 MHz)    | 27          |
| Figure S22 <sup>13</sup> C-NMR spectrum of Sebestenoid D (4) (MeOH- <i>d</i> <sub>4</sub> , 125 MHz)   | 28          |
| Figure S23 COSY NMR spectrum of Sebestenoid D (4) (MeOH- <i>d</i> <sub>4</sub> , 500 MHz)              | 29          |
| Figure S24 HSQC NMR spectrum of Sebestenoid D (4) (MeOH- <i>d</i> <sub>4</sub> , 500 MHz)              | 30          |
| Figure S25 HMBC NMR spectrum of Sebestenoid D (4) (MeOH- <i>d</i> <sub>4</sub> , 500 MHz)              | 31          |
| Figure S26 ROESY NMR spectrum of Sebestenoid D (4) (MeOH- <i>d</i> <sub>4</sub> , 500 MHz)             | 32          |

**Table S1.** NMR Spectroscopic Data (500 MHz) in MeOH-*d*<sub>4</sub> for Sebestenoid A (1)

| Position         | $\delta_C$ , mult.    | $\delta_H$ ( <i>J</i> in Hz) | COSY  | HMBC                         | ROESY              |
|------------------|-----------------------|------------------------------|-------|------------------------------|--------------------|
| 1                | 127.7, qC             |                              |       | H-2, H-5, H-6, H-7, H-8      |                    |
| 2                | 117.3, CH             | 7.28, d (2.1)                |       |                              | H-7                |
| 3                | 146.1, qC             |                              |       | H-2, H-5                     |                    |
| 4                | 148.5, qC             |                              |       | H-2, H-5, H-6                |                    |
| 5                | 116.1, CH             | 6.73, d (8.2)                | H-6   |                              |                    |
| 6                | 122.7, CH             | 6.89, dd (8.2, 2.1)          | H-5   |                              | H-7                |
| 7                | 113.3, CH             | 5.63, d (7.2)                | H-8   |                              | H-2, H-6           |
| 8                | 132.8, CH             | 7.22, d (7.2)                | H-7   |                              |                    |
| 1'               | 130.8, qC             |                              |       | H-2', H-5', H-6', H-7', H-8' |                    |
| 2'               | 116.8, CH             | 7.27, d (2.0)                |       |                              | H-7', H-8'         |
| 3'               | 145.5, qC             |                              |       | H-2', H-5'                   |                    |
| 4'               | 148.4, qC             |                              |       | H-2', H-5', H-6', H-7''      |                    |
| 5'               | 115.5, CH             | 6.76, d (8.2)                | H-6'  |                              | H-7''              |
| 6'               | 122.3, CH             | 7.04, dd (8.2, 2.0)          | H-5'  |                              | H-7', H-8'         |
| 7'               | 148.0, CH             | 7.75, d (15.8)               | H-8'  |                              | H-2', H-6'         |
| 8'               | 115.8, CH             | 6.55, d (15.8)               | H-7'  |                              | H-2', H-6'         |
| 9'               | 165.4, qC             |                              |       | H-7', H-8', H-8              |                    |
| 1''              | 125.4, qC             |                              |       | H-2'', H-5'', H-6'', H-7''   |                    |
| 2''              | 118.2, CH             | 7.24, d (2.0)                |       |                              | H-7''              |
| 3''              | 146.1, qC             |                              |       | H-2'', H-5''                 |                    |
| 4''              | 149.2, qC             |                              |       | H-2'', H-5'', H-6''          |                    |
| 5''              | 116.4, CH             | 6.73, d (8.4)                | H-6'' |                              |                    |
| 6''              | 125.2, CH             | 7.08, dd (8.4, 2.0)          | H-5'' |                              | H-7''              |
| 7''              | 129.8, CH             | 7.33, s                      |       |                              | H-5', H-2'', H-6'' |
| 8''              | 138.3, qC             |                              |       | H-7''                        |                    |
| 9''              | 165.6, qC             |                              |       | H-7'', OCH <sub>3</sub>      |                    |
| OCH <sub>3</sub> | 52.8, CH <sub>3</sub> | 3.72, s                      |       |                              |                    |

**Table S2.** NMR Spectroscopic Data (500 MHz) in MeOH-*d*<sub>4</sub> for Sebestenoid B (2)

| Position         | $\delta_C$ , mult.    | $\delta_H$ ( <i>J</i> in Hz) | COSY  | HMBC                         | ROESY        |
|------------------|-----------------------|------------------------------|-------|------------------------------|--------------|
| 1                | 127.3, qC             |                              |       | H-2, H-6, H-7, H-8           |              |
| 2                | 116.6, CH             | 6.69, d (1.5)                |       |                              | H-7, H-8     |
| 3                | 146.3, qC             |                              |       | H-2, H-4                     |              |
| 4                | 113.6, CH             | 6.83, d (1.5)                |       |                              |              |
| 5                | 146.5, qC             |                              |       | H-4, H-6                     |              |
| 6                | 119.6, CH             | 6.70, d (1.5)                |       |                              | H-7, H-8     |
| 7                | 116.8, CH             | 6.36, d (12.8)               | H-8   |                              | H-2, H-6     |
| 8                | 135.4, CH             | 7.78, d (12.8)               | H-7   |                              | H-2, H-6     |
| 1'               | 130.8, qC             |                              |       | H-2', H-5', H-6', H-7', H-8' |              |
| 2'               | 116.8, CH             | 7.23, d (2.0)                |       |                              | H-7', H-8'   |
| 3'               | 146.6, qC             |                              |       | H-2', H-5'                   |              |
| 4'               | 148.8, qC             |                              |       | H-2', H-5', H-6'             |              |
| 5'               | 115.5, CH             | 6.74, d (8.4)                | H-6'  |                              |              |
| 6'               | 122.3, CH             | 7.00, dd (8.4, 2.0)          | H-5'  |                              | H-7', H-8'   |
| 7'               | 147.6, CH             | 7.69, d (15.8)               | H-8'  |                              | H-2', H-6'   |
| 8'               | 115.7, CH             | 6.42, d (15.8)               | H-7'  |                              | H-2', H-6'   |
| 9'               | 165.9, qC             |                              |       | H-8, H-7', H-8'              |              |
| 1''              | 125.4, qC             |                              |       | H-2'', H-5'', H-6'', H-7''   |              |
| 2''              | 118.1, CH             | 7.26, d (2.0)                |       |                              | H-7''        |
| 3''              | 148.0, qC             |                              |       | H-2'', H-5''                 |              |
| 4''              | 149.2, qC             |                              |       | H-2'', H-5'', H-6''          |              |
| 5''              | 116.4, CH             | 6.72, d (8.4)                | H-6'' |                              |              |
| 6''              | 125.2, CH             | 7.07, dd (8.4, 2.0)          | H-5'' |                              | H-7''        |
| 7''              | 129.8, CH             | 7.33, s                      |       |                              | H-2'', H-6'' |
| 8''              | 138.2, qC             |                              |       | H-7'', H-4                   |              |
| 9''              | 165.5, qC             |                              |       | H-7'', OCH <sub>3</sub>      |              |
| OCH <sub>3</sub> | 52.8, CH <sub>3</sub> | 3.72, s                      |       |                              |              |

**Table S3.** NMR Spectroscopic Data (500 MHz) in MeOH-*d*<sub>4</sub> for Sebestenoid C (3)

| Position         | $\delta_C$ , mult.    | $\delta_H$ ( <i>J</i> in Hz)                 | COSY   | HMBC                                   | ROESY          |
|------------------|-----------------------|----------------------------------------------|--------|----------------------------------------|----------------|
| 1                | 127.8, qC             |                                              |        | H-2, H-5, H-6, H-7, H-8                |                |
| 2                | 117.4, CH             | 7.27, d (2.0)                                |        |                                        | H-7            |
| 3                | 146.0, qC             |                                              |        | H-2, H-5                               |                |
| 4                | 145.7, qC             |                                              |        | H-2, H-5, H-6                          |                |
| 5                | 116.5, CH             | 6.75, d (8.2)                                | H-6    |                                        |                |
| 6                | 122.8, CH             | 6.92, dd (8.2, 2.0)                          | H-5    |                                        | H-7            |
| 7                | 113.2, CH             | 5.61, d (7.3)                                | H-8    |                                        | H-2, H-6       |
| 8                | 132.9, CH             | 7.21, d (7.3)                                | H-7    |                                        |                |
| 1'               | 124.5, qC             |                                              |        | H-5', H-6', H-7', H-8', H-8''          |                |
| 2'               | 126.5, qC             |                                              |        | H-6', H-7', H-7'', H-8''               |                |
| 3'               | 149.1, qC             |                                              |        | H-5', H-7'', H-8''                     |                |
| 4'               | 145.9, qC             |                                              |        | H-5', H-6'                             |                |
| 5'               | 118.6, CH             | 6.87, d (8.3)                                | H-6'   |                                        |                |
| 6'               | 122.2, CH             | 7.30, d (8.3)                                | H-5'   |                                        | H-7', H-8'     |
| 7'               | 144.9, CH             | 7.80, d (15.9)                               | H-8'   |                                        | H-6', H-8''    |
| 8'               | 115.7, CH             | 6.44, d (15.9)                               | H-7'   |                                        | H-6'           |
| 9'               | 165.5, qC             |                                              |        | H-8, H-7', H-8'                        |                |
| 1''              | 133.5, qC             |                                              |        | H-2'', H-5'', H-6'', H-7'', H-8''      |                |
| 2''              | 113.3, CH             | 6.75, d (2.0)                                |        |                                        | H-7'', H-8''   |
| 3''              | 146.1, qC             |                                              |        | H-2'', H-5''                           |                |
| 4''              | 146.8, qC             |                                              |        | H-2'', H-5'', H-6''                    |                |
| 5''              | 116.3, CH             | 6.74, d (8.2)                                | H-6''  |                                        |                |
| 6''              | 118.3, CH             | 6.63, dd (8.2, 2.0)                          | H-5''  |                                        | H-7''          |
| 7''              | 88.1, CH              | 5.81, d (4.4)                                | H-8''  |                                        | H-2'', H-6''   |
| 8''              | 57.4, CH              | 4.42, d (4.4)                                | H-7''  |                                        | H-2'', H-7'    |
| 9''              | 172.3, qC             |                                              |        | H-7'', H-8'', H-8'''                   |                |
| 1'''             | 128.5, qC             |                                              |        | H-2''', H-5''', H-6''', H-7''', H-8''' |                |
| 2'''             | 117.2, CH             | 6.56, d (2.0)                                |        |                                        | H-7''', H-8''' |
| 3'''             | 146.6, qC             |                                              |        | H-2''', H-5'''                         |                |
| 4'''             | 145.2, qC             |                                              |        | H-2''', H-5''', H-6'''                 |                |
| 5'''             | 116.5, CH             | 6.56, d (8.1)                                | H-6''' |                                        |                |
| 6'''             | 121.8, CH             | 6.36, dd (8.1, 2.0)                          | H-5''' |                                        | H-7''', H-8''' |
| 7'''             | 37.4, CH <sub>2</sub> | 2.84, dd (14.2, 9.2)<br>2.96, dd (14.2, 4.5) | H-8''' |                                        | H-2''', H-6''' |
| 8'''             | 75.7, CH              | 5.16, dd (9.2, 4.5)                          | H-7''' |                                        | H-2''', H-6''' |
| 9'''             | 171.2, qC             |                                              |        | H-7''', H-8''', OCH <sub>3</sub>       |                |
| OCH <sub>3</sub> | 52.8, CH <sub>3</sub> | 3.62, s                                      |        |                                        |                |

**Table S4.** NMR Spectroscopic Data (500 MHz) in MeOH-*d*<sub>4</sub> for Sebestenoid D (4)

| Position         | $\delta_C$ , mult.    | $\delta_H$ ( <i>J</i> in Hz) | COSY   | HMBC                                   | ROESY          |
|------------------|-----------------------|------------------------------|--------|----------------------------------------|----------------|
| 1                | 127.5, qC             |                              |        | H-2, H-6, H-7, H-8                     |                |
| 2                | 116.5, CH             | 6.67, d (1.7)                |        |                                        | H-7, H-8       |
| 3                | 146.2, qC             |                              |        | H-2, H-4                               |                |
| 4                | 113.6, CH             | 6.81, d (1.7)                |        |                                        |                |
| 5                | 146.3, qC             |                              |        | H-4, H-6                               |                |
| 6                | 119.6, CH             | 6.68, d (1.7)                |        |                                        | H-7, H-8       |
| 7                | 116.8, CH             | 6.35, d (12.8)               | H-8    |                                        | H-2, H-6       |
| 8                | 135.5, CH             | 7.76, d (12.8)               | H-7    |                                        | H-2, H-6       |
| 1'               | 124.4, qC             |                              |        | H-5', H-6', H-7', H-8', H-8''          |                |
| 2'               | 126.3, qC             |                              |        | H-6', H-7', H-7'', H-8''               |                |
| 3'               | 149.2, qC             |                              |        | H-5', H-7'', H-8''                     |                |
| 4'               | 145.7, qC             |                              |        | H-5', H-6'                             |                |
| 5'               | 118.6, CH             | 6.84, d (8.4)                | H-6'   |                                        |                |
| 6'               | 122.3, CH             | 7.22, d (8.4)                | H-5'   |                                        | H-7', H-8'     |
| 7'               | 144.5, CH             | 7.70, d (15.9)               | H-8'   |                                        | H-6', H-8''    |
| 8'               | 115.7, CH             | 6.29, d (15.9)               | H-7'   |                                        | H-6'           |
| 9'               | 165.9, qC             |                              |        | H-8, H-7', H-8'                        |                |
| 1''              | 133.5, qC             |                              |        | H-2'', H-5'', H-6'', H-7'', H-8''      |                |
| 2''              | 113.3, CH             | 6.73, (2.1)                  |        |                                        | H-7'', H-8''   |
| 3''              | 146.5, qC             |                              |        | H-2'', H-5''                           |                |
| 4''              | 146.6, qC             |                              |        | H-2'', H-5'', H-6''                    |                |
| 5''              | 116.4, CH             | 6.75, d (8.2)                | H-6''  |                                        |                |
| 6''              | 118.3, CH             | 6.62, dd (8.2, 2.1)          | H-5''  |                                        | H-7''          |
| 7''              | 88.2, CH              | 5.80, d (4.6)                | H-8''  |                                        | H-2'', H-6''   |
| 8''              | 57.6, CH              | 4.38, d (4.6)                | H-7''  |                                        | H-2'', H-7''   |
| 9''              | 172.3, qC             |                              |        | H-7'', H-8'', H-8'''                   |                |
| 1'''             | 128.5, qC             |                              |        | H-2''', H-5''', H-6''', H-7''', H-8''' |                |
| 2'''             | 117.3, CH             | 6.59, d (2.0)                |        |                                        | H-7''', H-8''' |
| 3'''             | 146.8, qC             |                              |        | H-2''', H-5'''                         |                |
| 4'''             | 145.3, qC             |                              |        | H-2''', H-5''', H-6'''                 |                |
| 5'''             | 116.5, CH             | 6.62, d (8.1)                | H-6''' |                                        |                |
| 6'''             | 121.8, CH             | 6.40, dd (8.1, 2.0)          | H-5''' |                                        | H-7''', H-8''' |
| 7'''             | 37.5, CH <sub>2</sub> | 2.91, dd (14.2, 9.2)         | H-8''' |                                        | H-2''', H-6''' |
| 8'''             | 75.7, CH              | 3.02, dd (14.2, 4.0)         |        |                                        |                |
| 9'''             | 171.2, qC             | 5.19, dd (9.2, 4.0)          | H-7''' |                                        | H-2''', H-6''' |
| OCH <sub>3</sub> | 52.9, CH <sub>3</sub> | 3.67, s                      |        | H-7''', H-8''', OCH <sub>3</sub>       |                |

jd-w-15-6-6a-1h

Figure S1  $^1\text{H-NMR}$  spectrum of Sebestenoid A (**1**) ( $\text{MeOH-}d_4$ , 500 MHz)

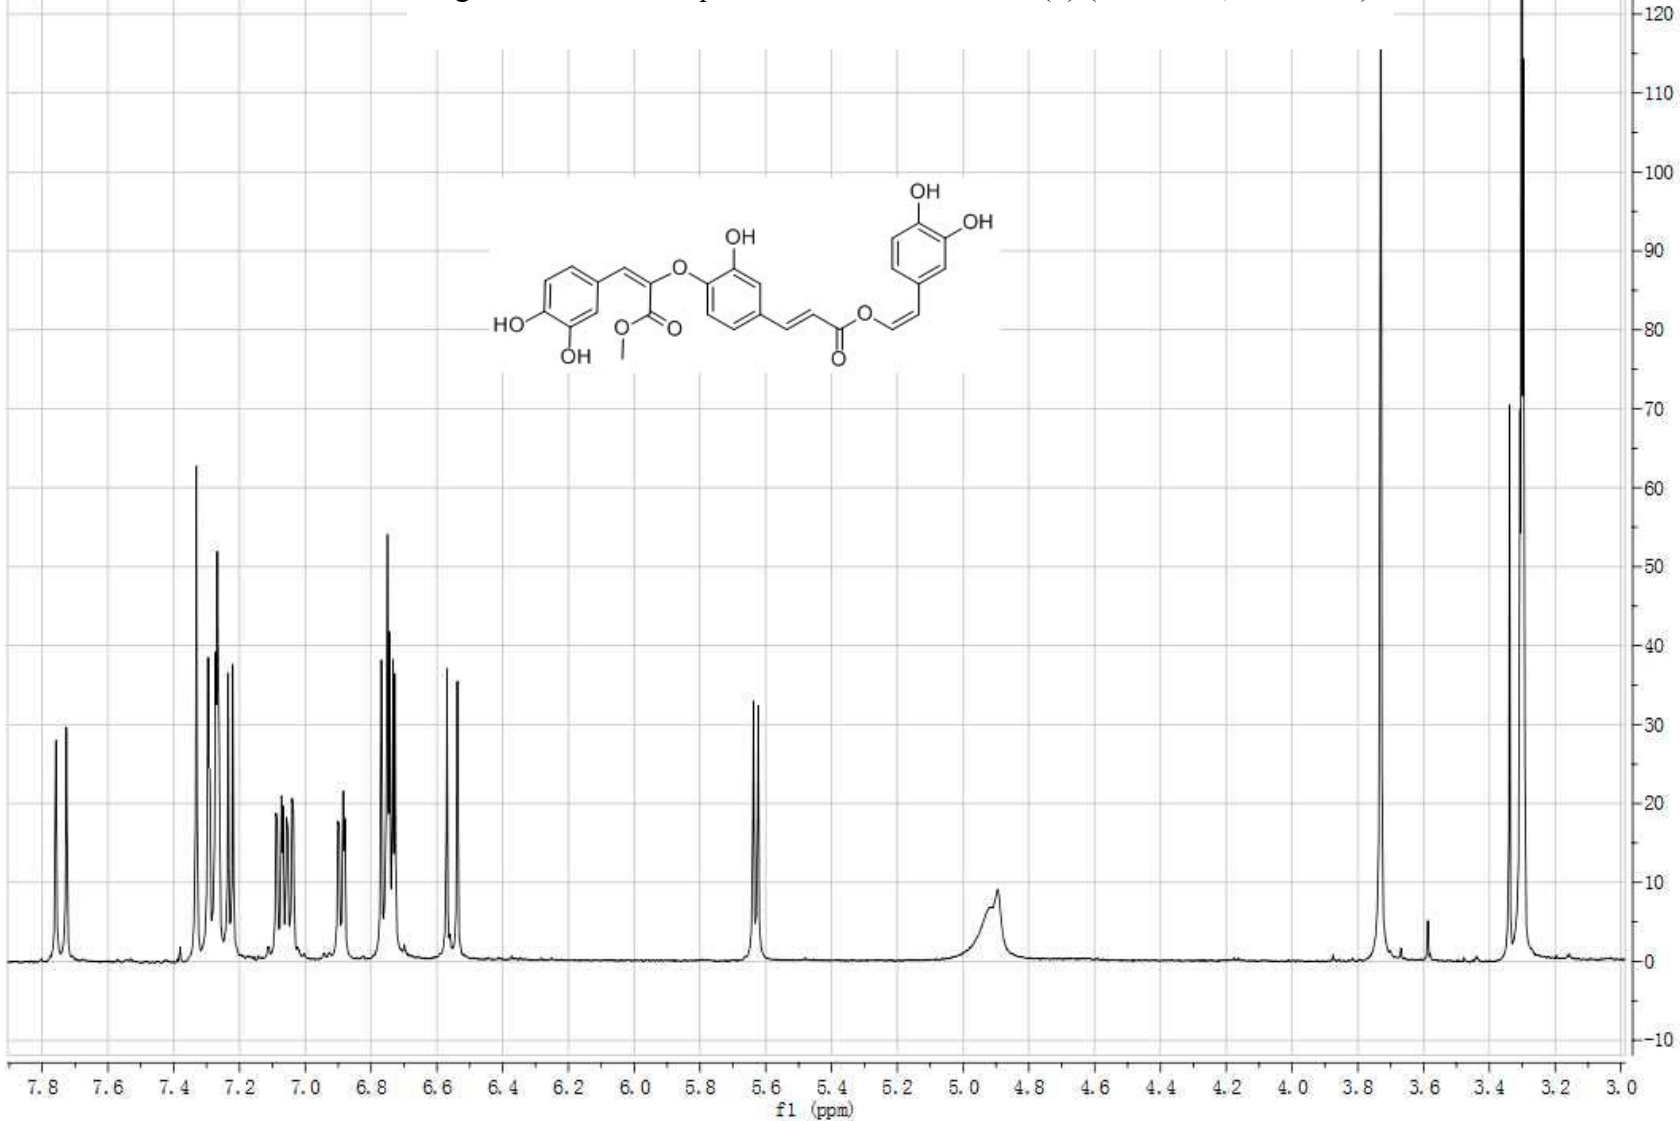





Figure S3 COSY NMR spectrum of Sebestenoid A (**1**) (MeOH-*d*<sub>4</sub>, 500 MHz)

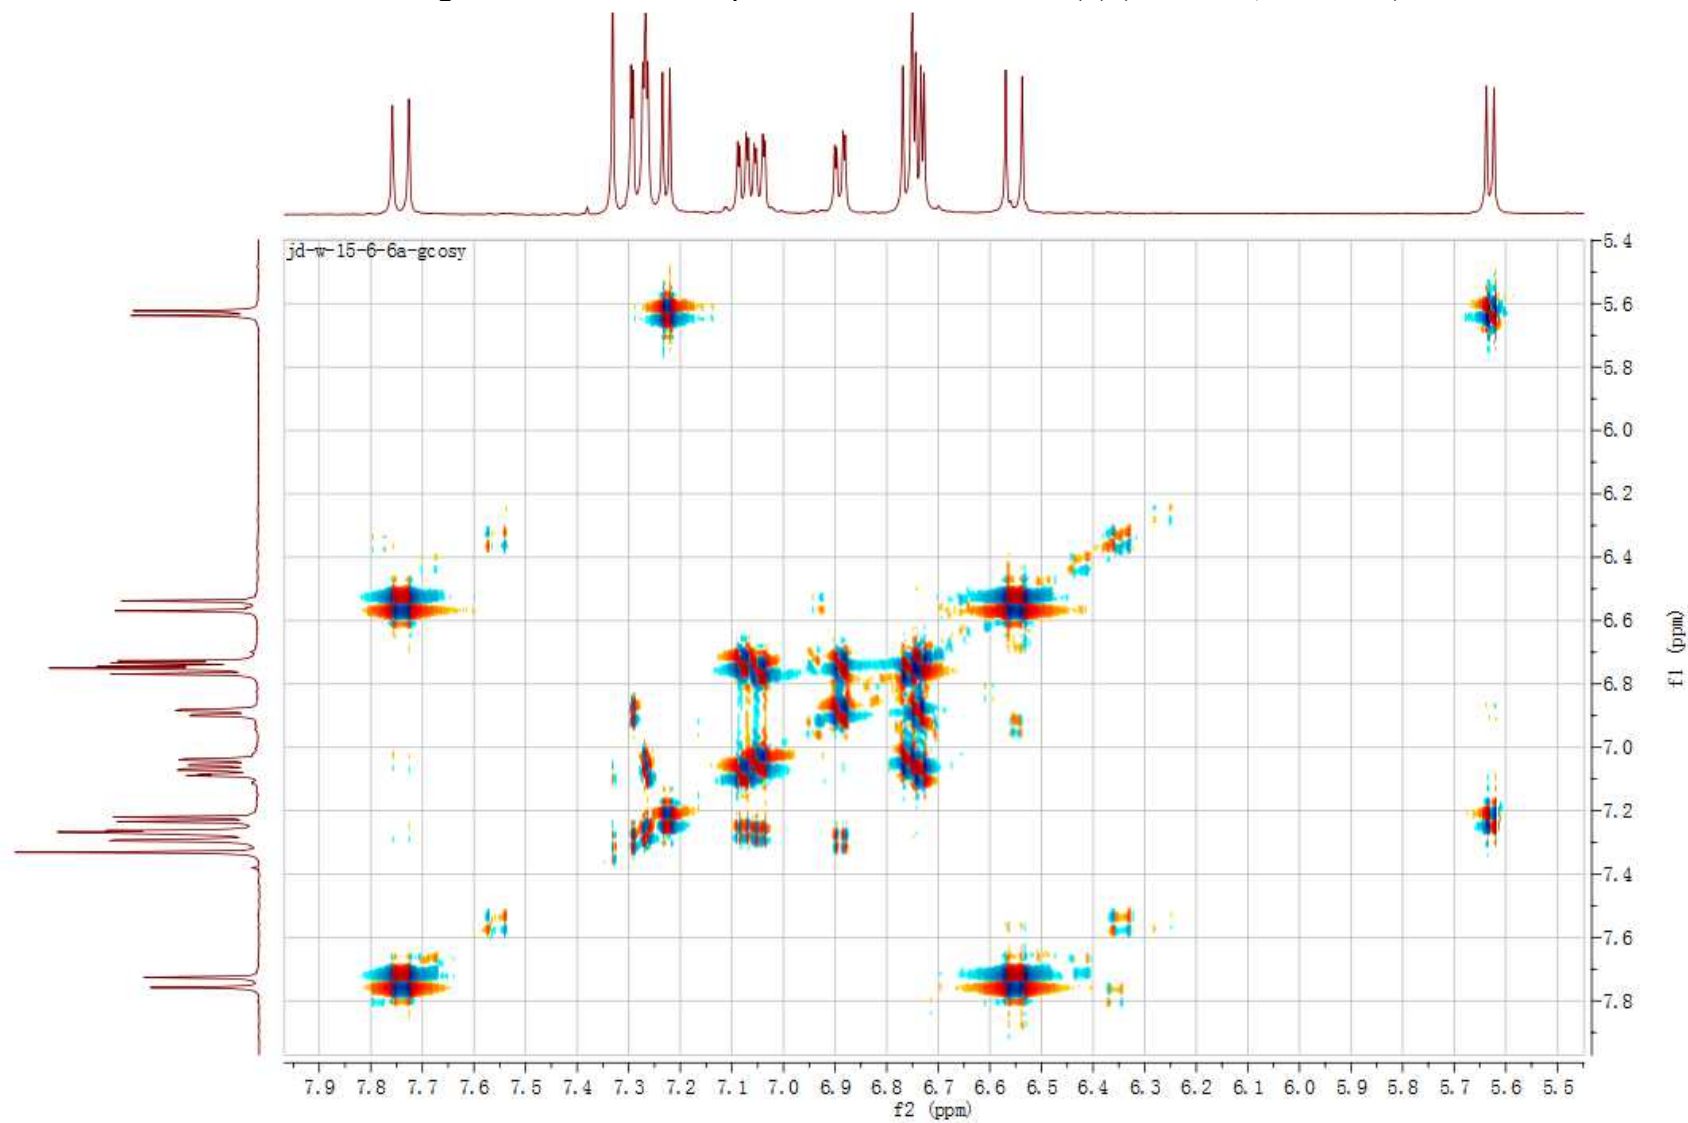

Figure S4 HSQC NMR spectrum of Sebestenoid A (**1**) (MeOH-*d*<sub>4</sub>, 500 MHz)

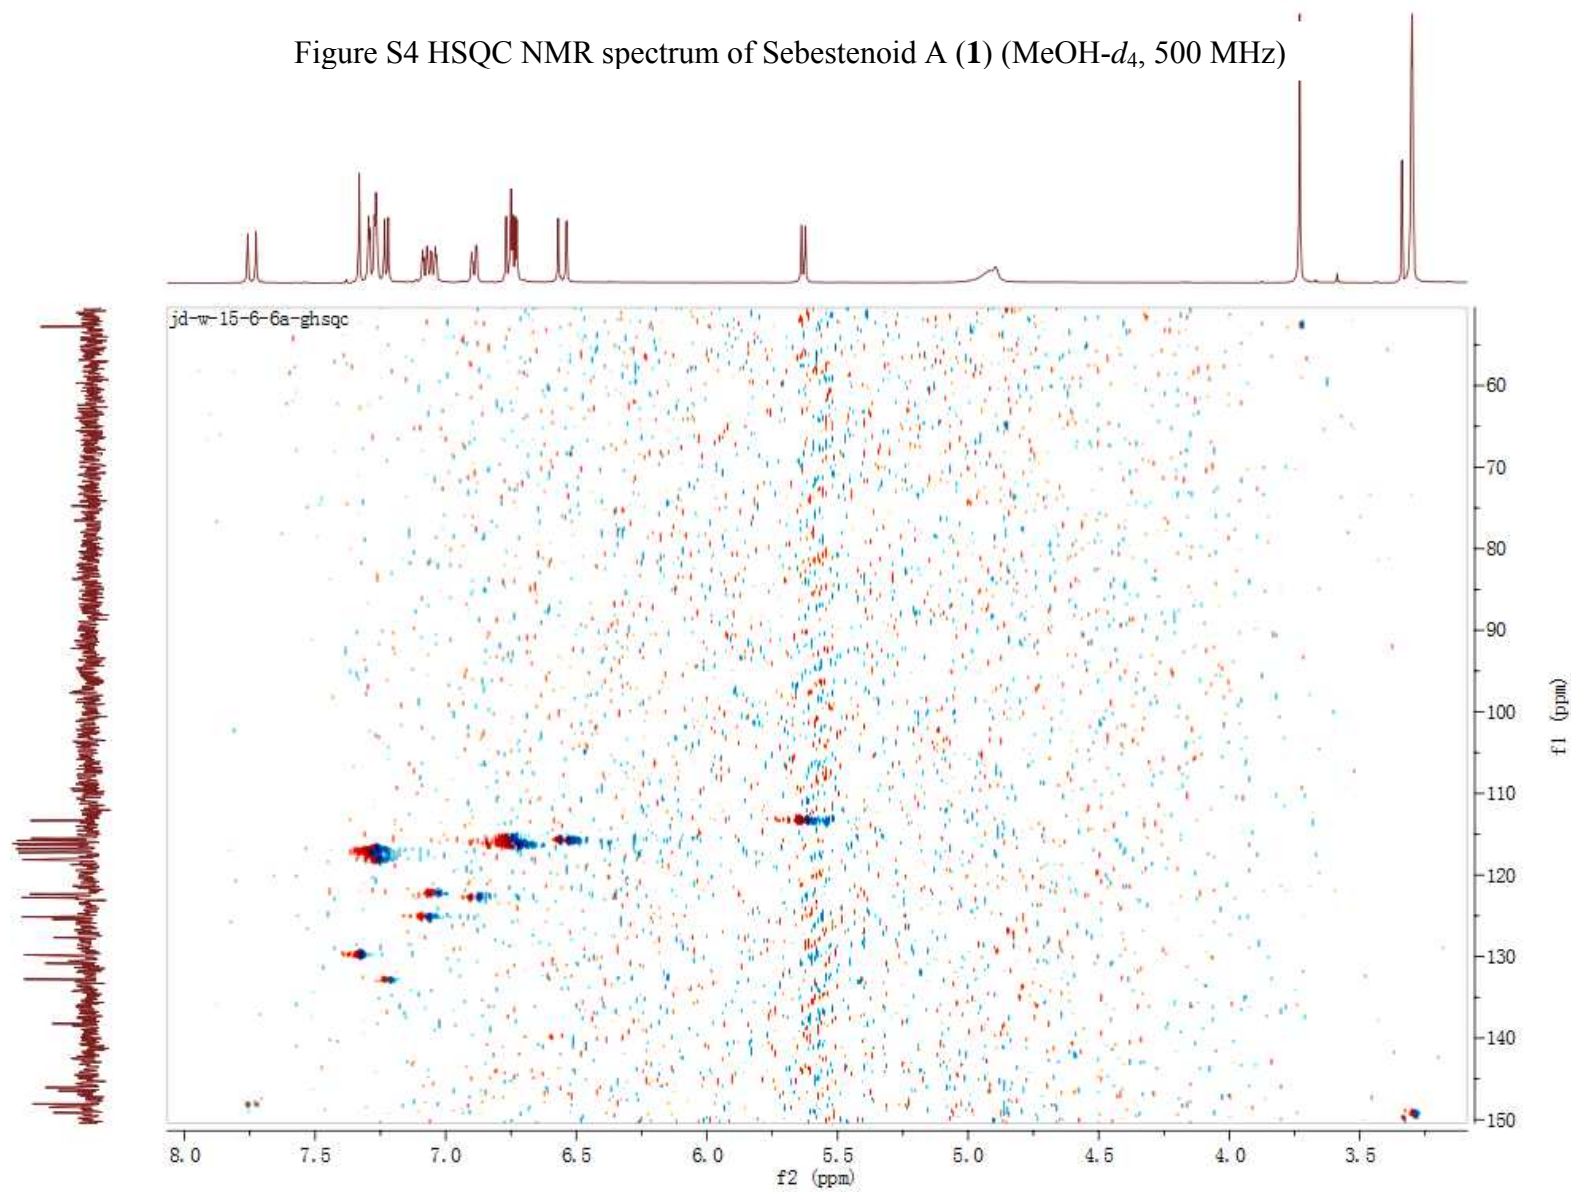

Figure S5 Expansion of HSQC NMR spectrum of Sebestenoid A (1) (MeOH-*d*<sub>4</sub>, 500 MHz)

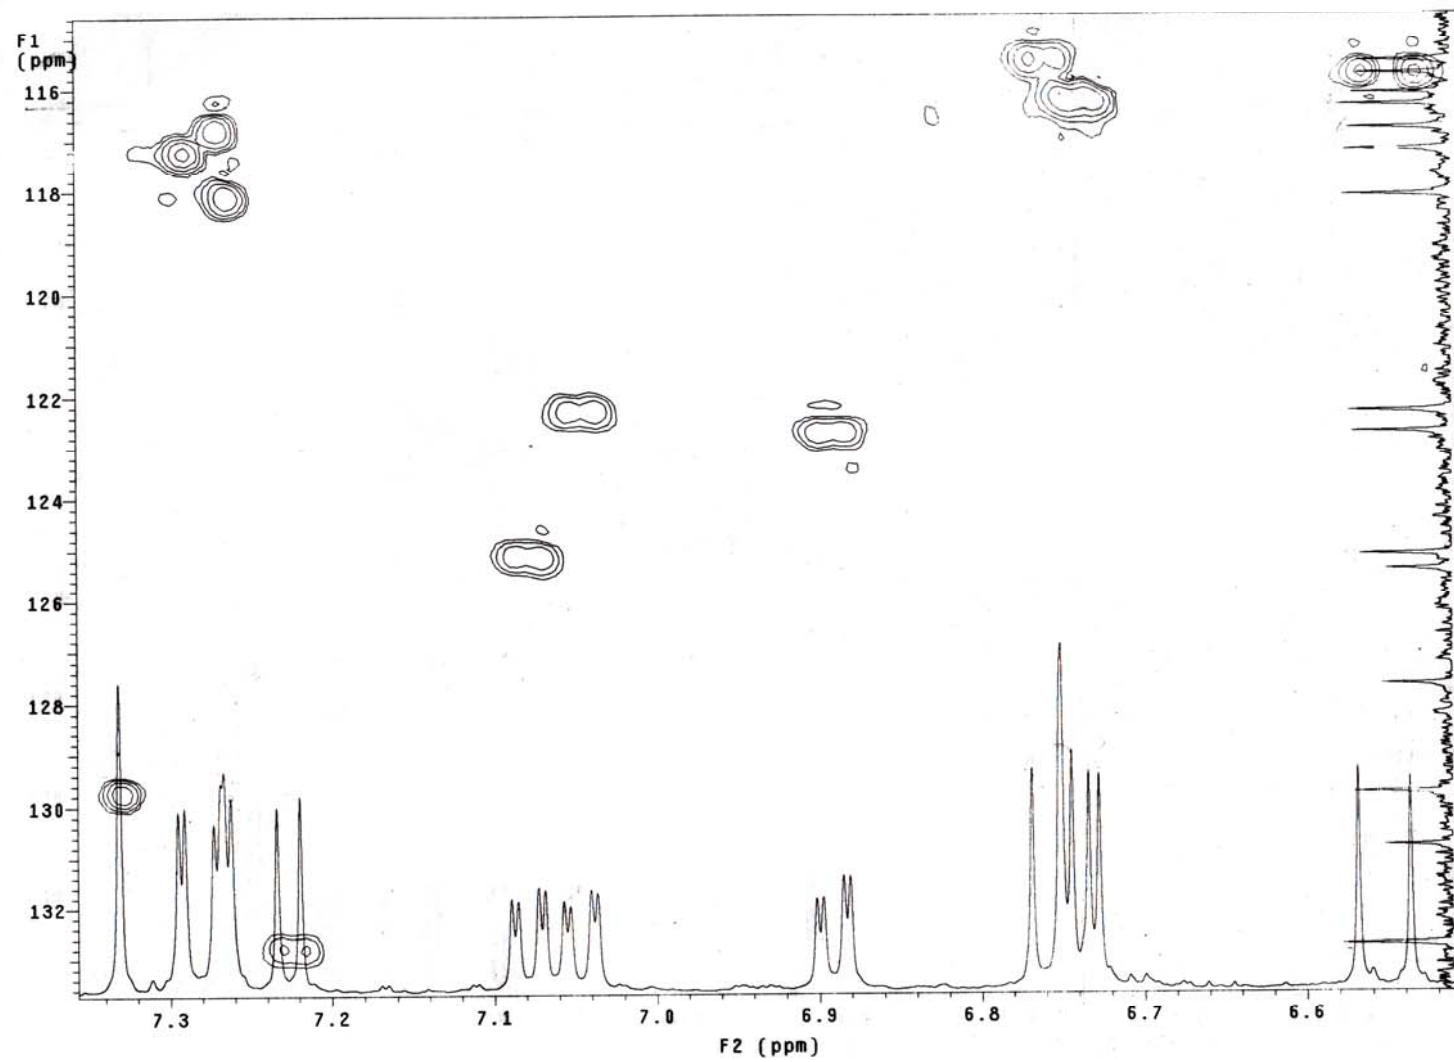

Figure S6 HMBC NMR spectrum of Sebestenoid A (1) (MeOH- $d_4$ , 500 MHz)

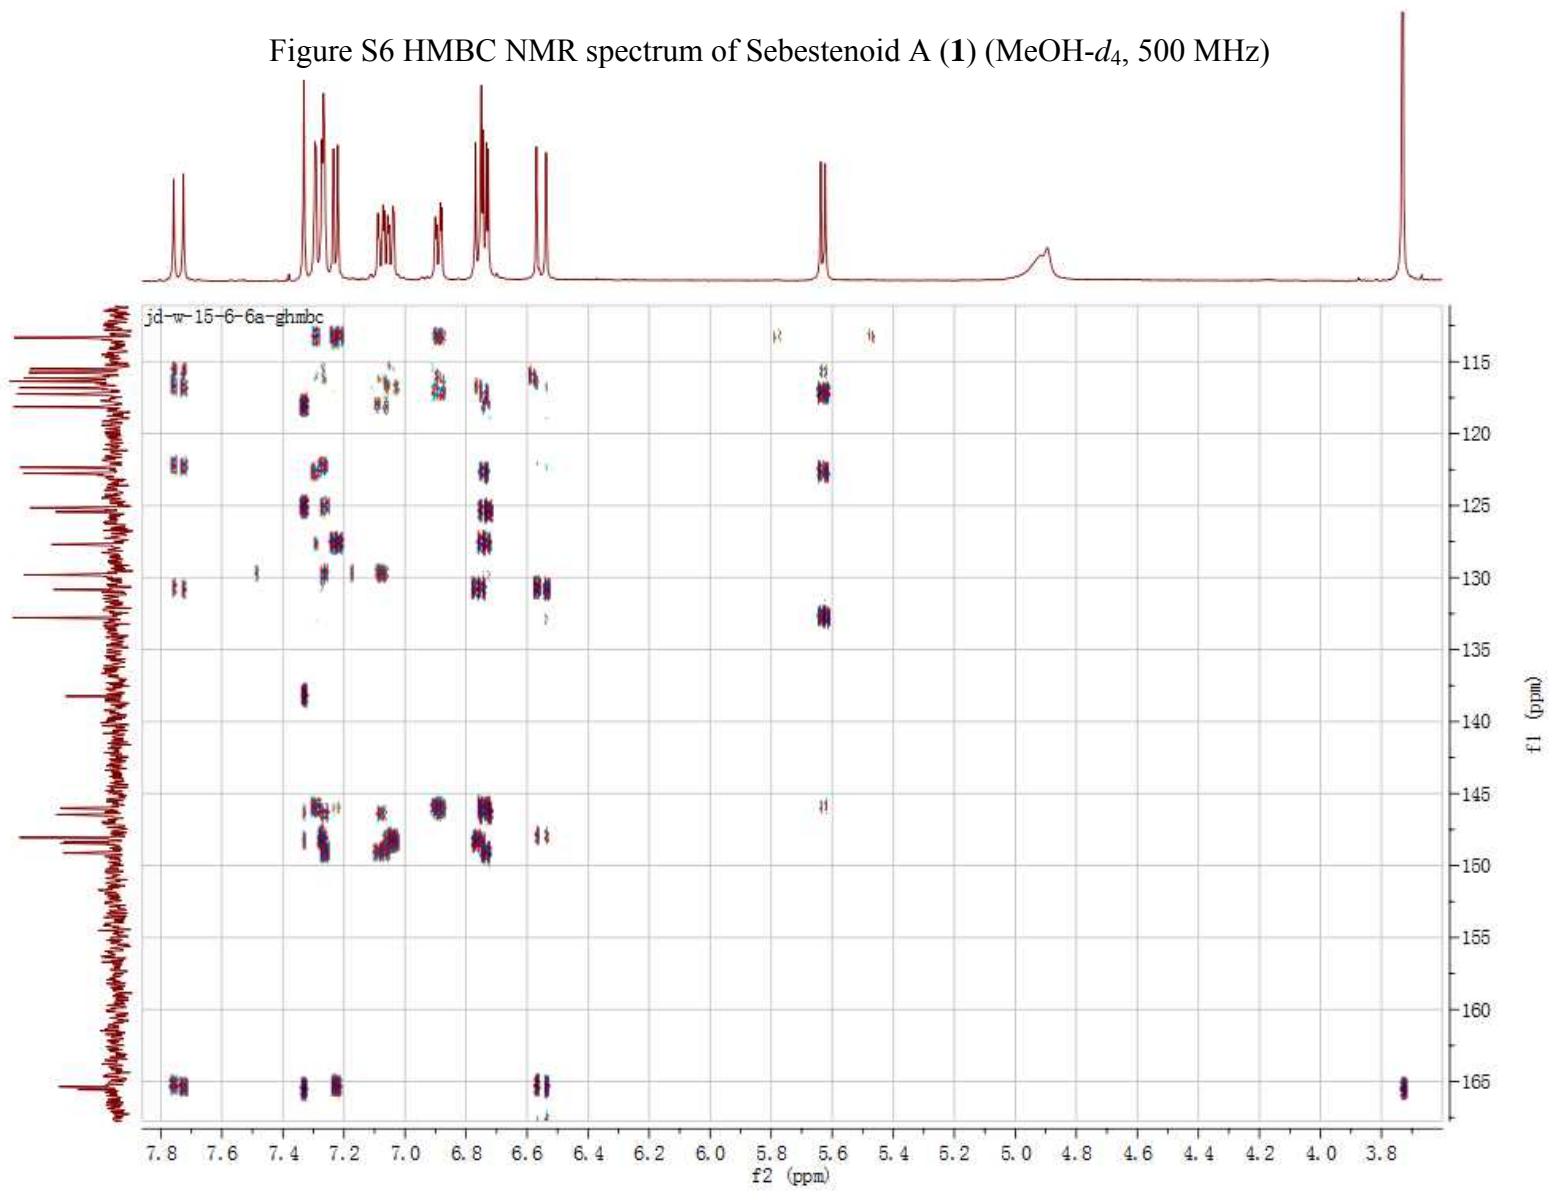

Figure S7 ROESY NMR spectrum of Sebestenoid A (1) (MeOH-*d*<sub>4</sub>, 500 MHz)

Pulse Sequence: ROESY  
Solvent: cd3od  
Temp: 22.0 C / 295.1 K  
Operator: vnmr1  
File: jd-w-15-6-6a-roesy  
INOVA-500 "localhost"  
  
Mixing 0.500 sec  
Acq. time 0.500 sec  
Width 2514.7 Hz  
2D Width 2514.7 Hz  
8 repetitions  
2 x 256 increments  
OBSERVE H1, 500.1133918 MHz  
DATA PROCESSING  
Gauss apodization 0.094 sec  
F1 DATA PROCESSING  
Gauss apodization 0.094 sec  
FT size 2048 x 2048  
Total time 2 hr, 21 min, 0 sec

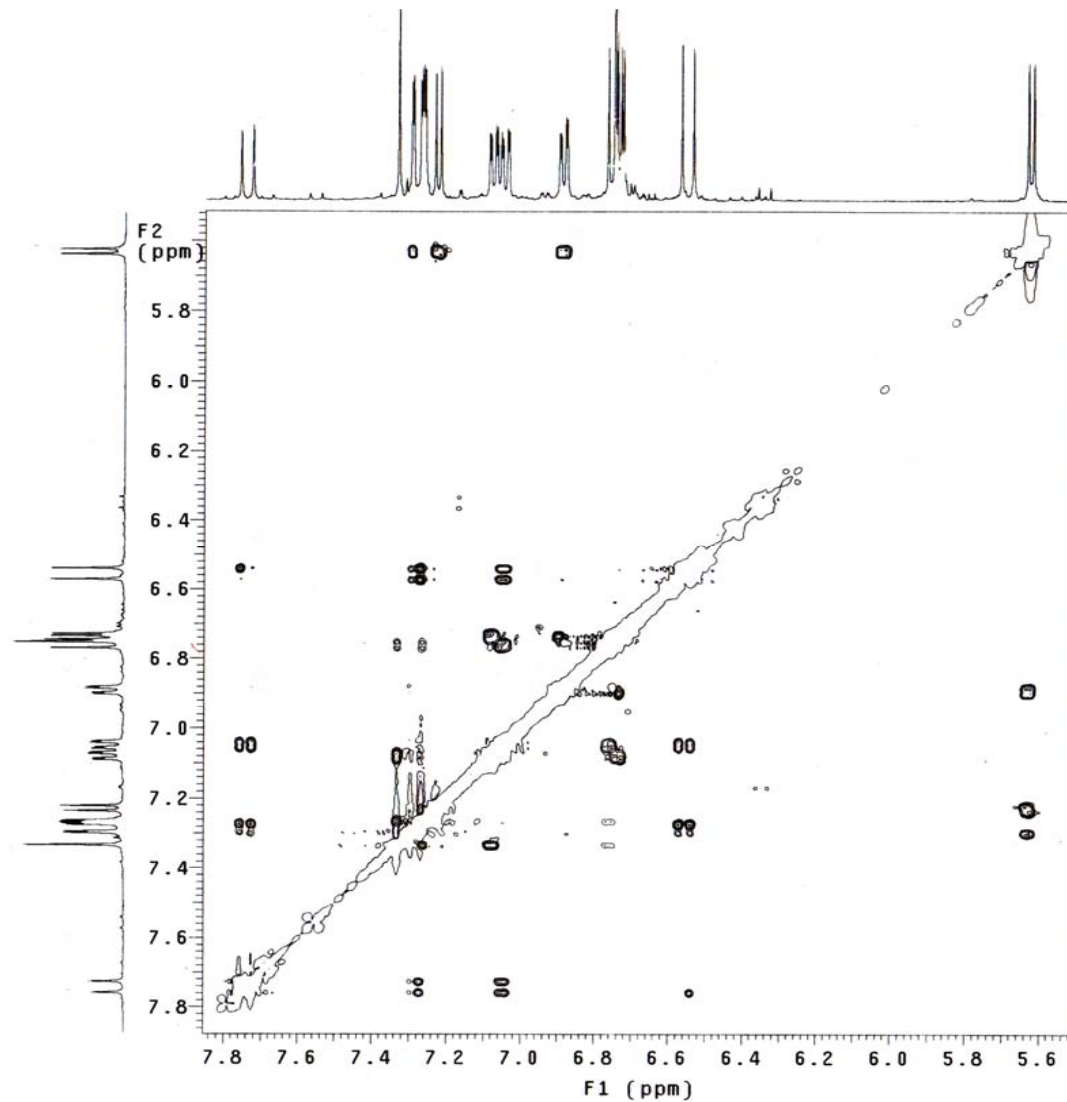

jd-w-15-6-5-1h

Figure S8  $^1\text{H-NMR}$  spectrum of Sebestenoid B (2) (MeOH- $d_4$ , 500 MHz)

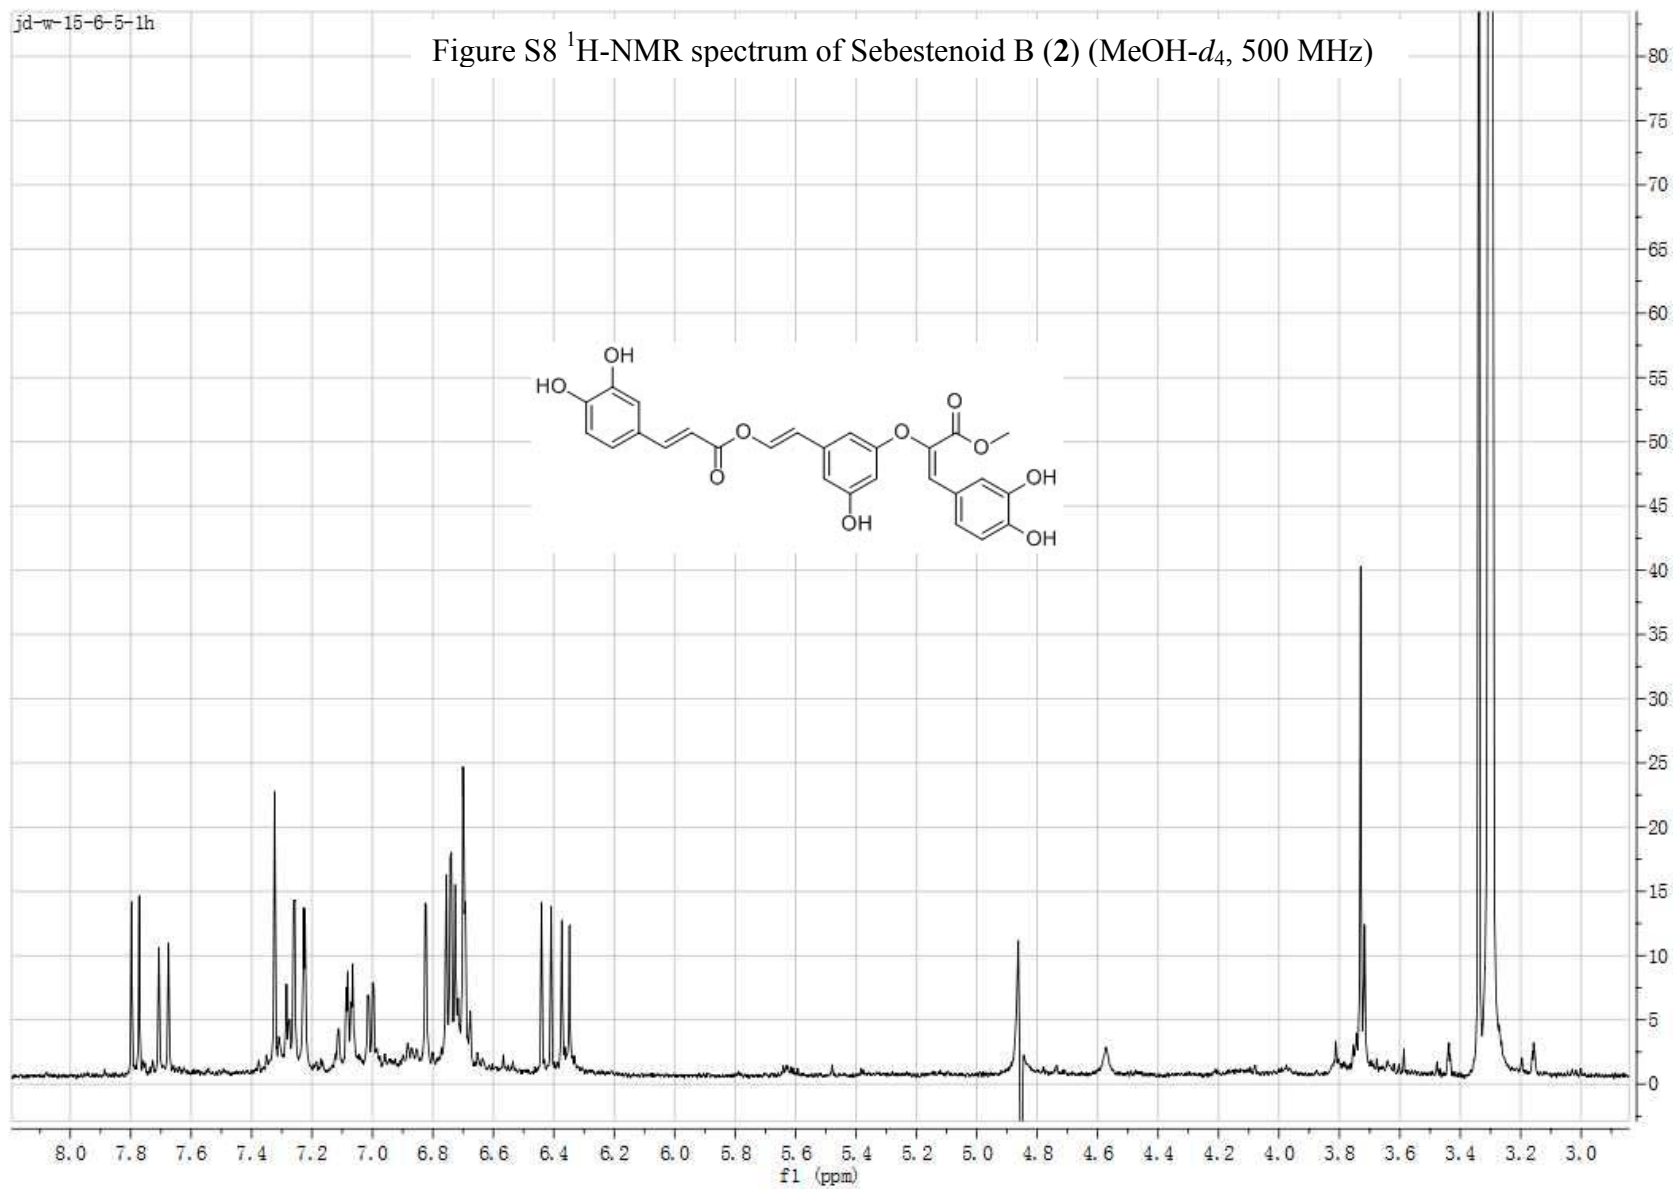

jd-w-15-6-5a-13c

Figure S9  $^{13}\text{C}$ -NMR spectrum of Sebestenoid B (2) (MeOH- $d_4$ , 125 MHz)

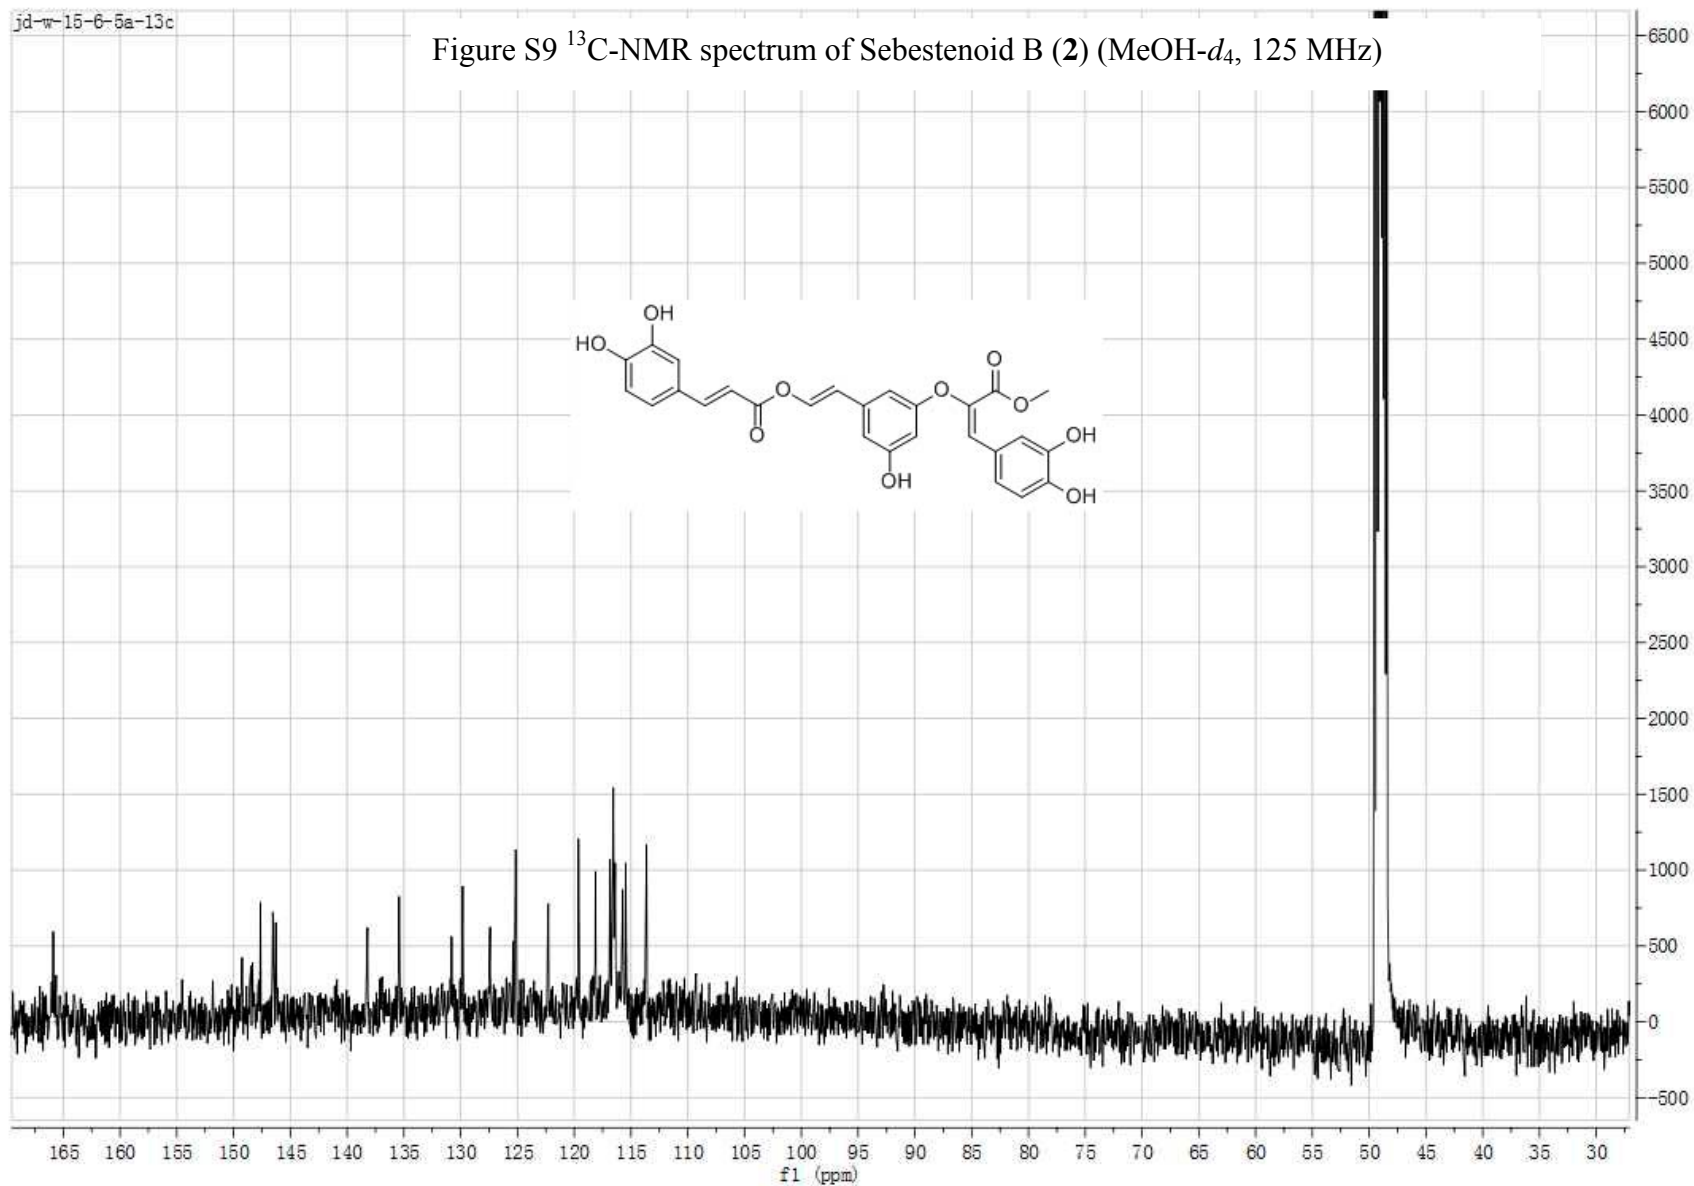



Figure S10 COSY NMR spectrum of Sebestenoid B (**2**) (MeOH-*d*<sub>4</sub>, 500 MHz)

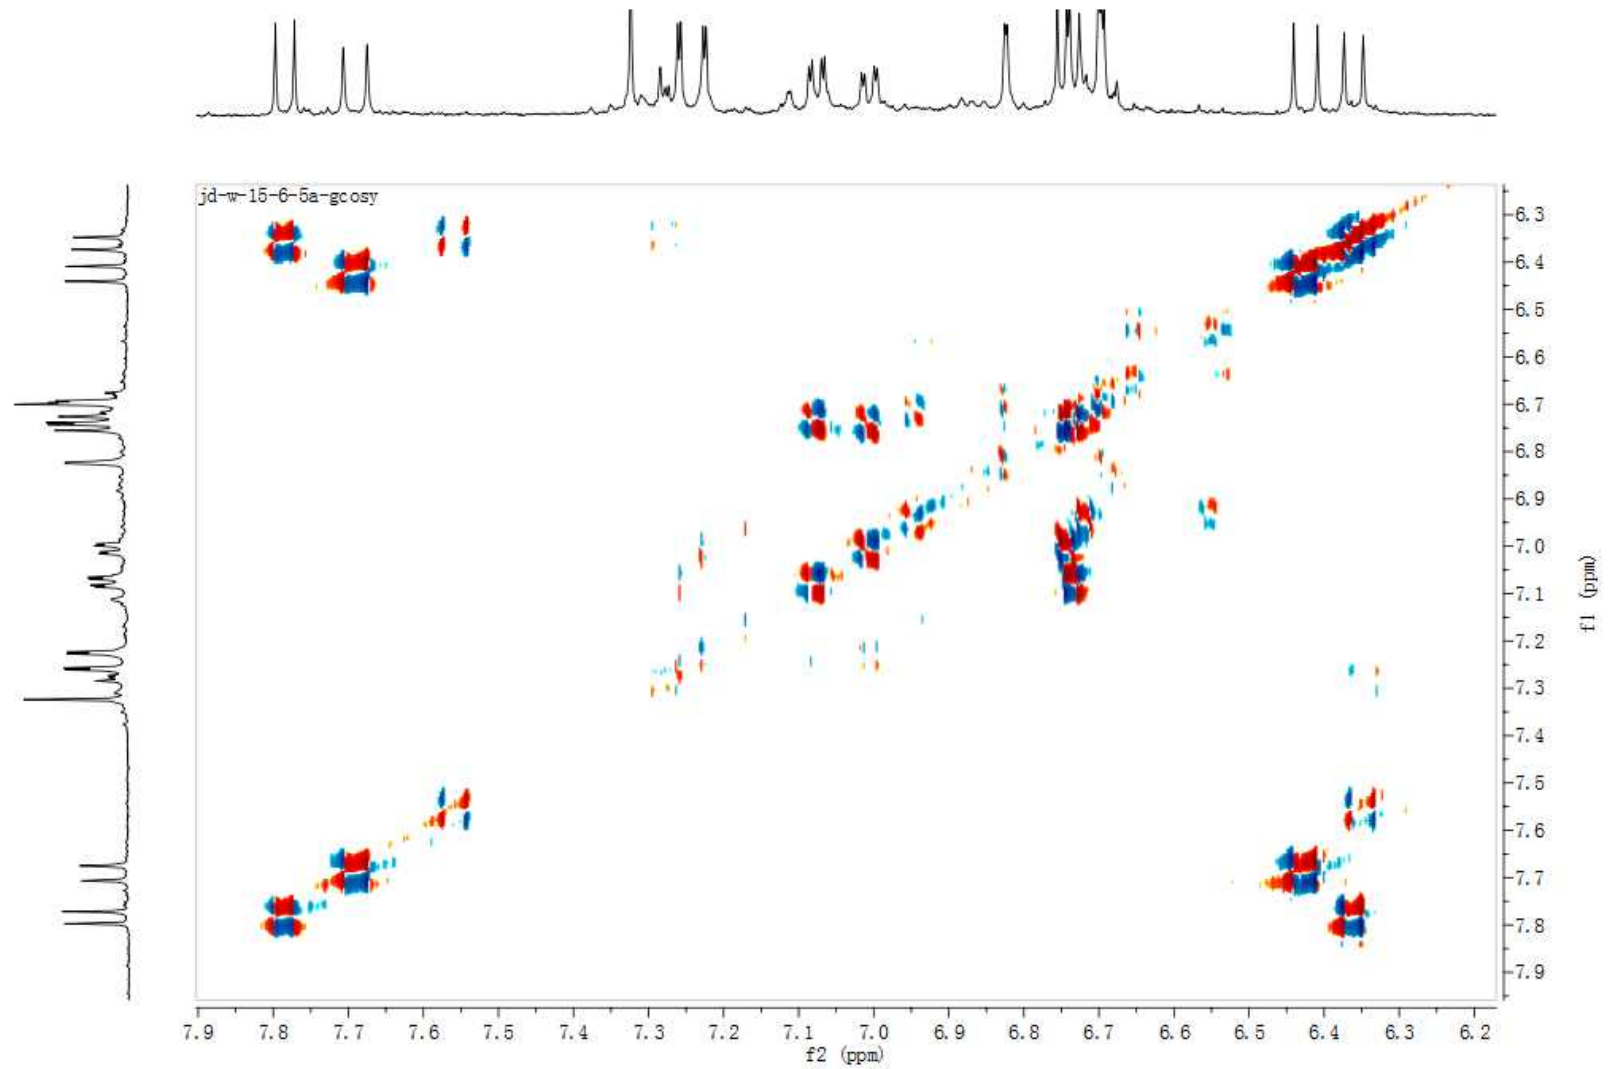



Figure S11 HSQC NMR spectrum of Sebestenoid B (2) (MeOH- $d_4$ , 500 MHz)

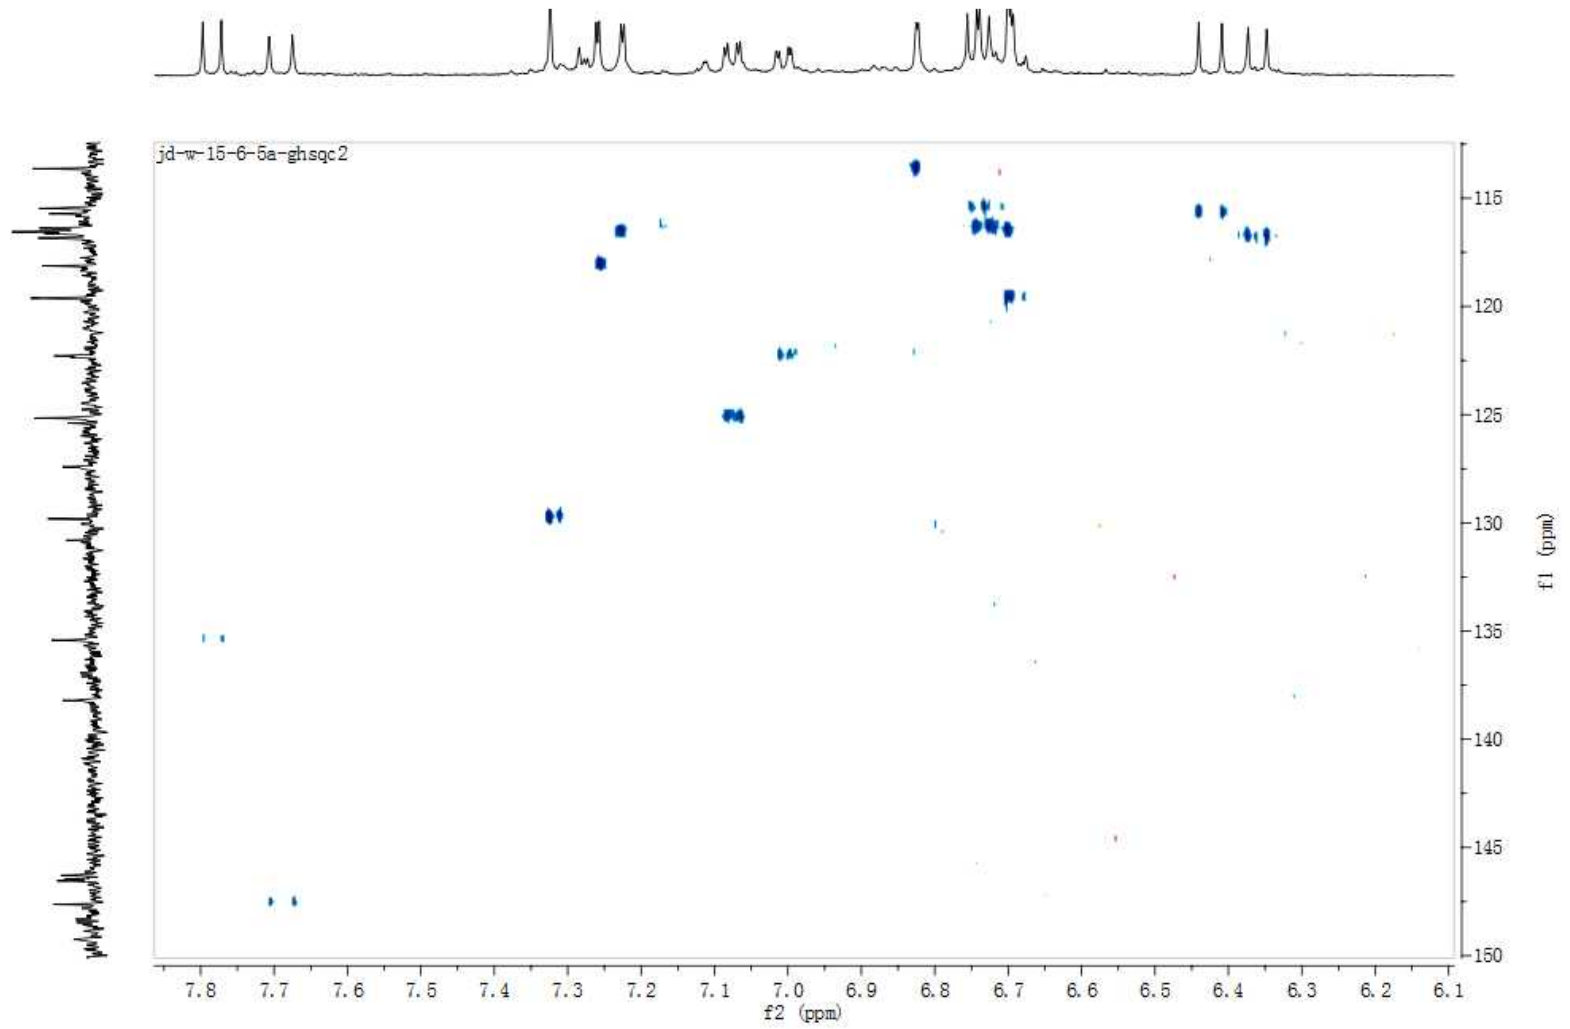

Figure S12 HMBC NMR spectrum of Sebestenoid B (**2**) (MeOH-*d*<sub>4</sub>, 500 MHz)

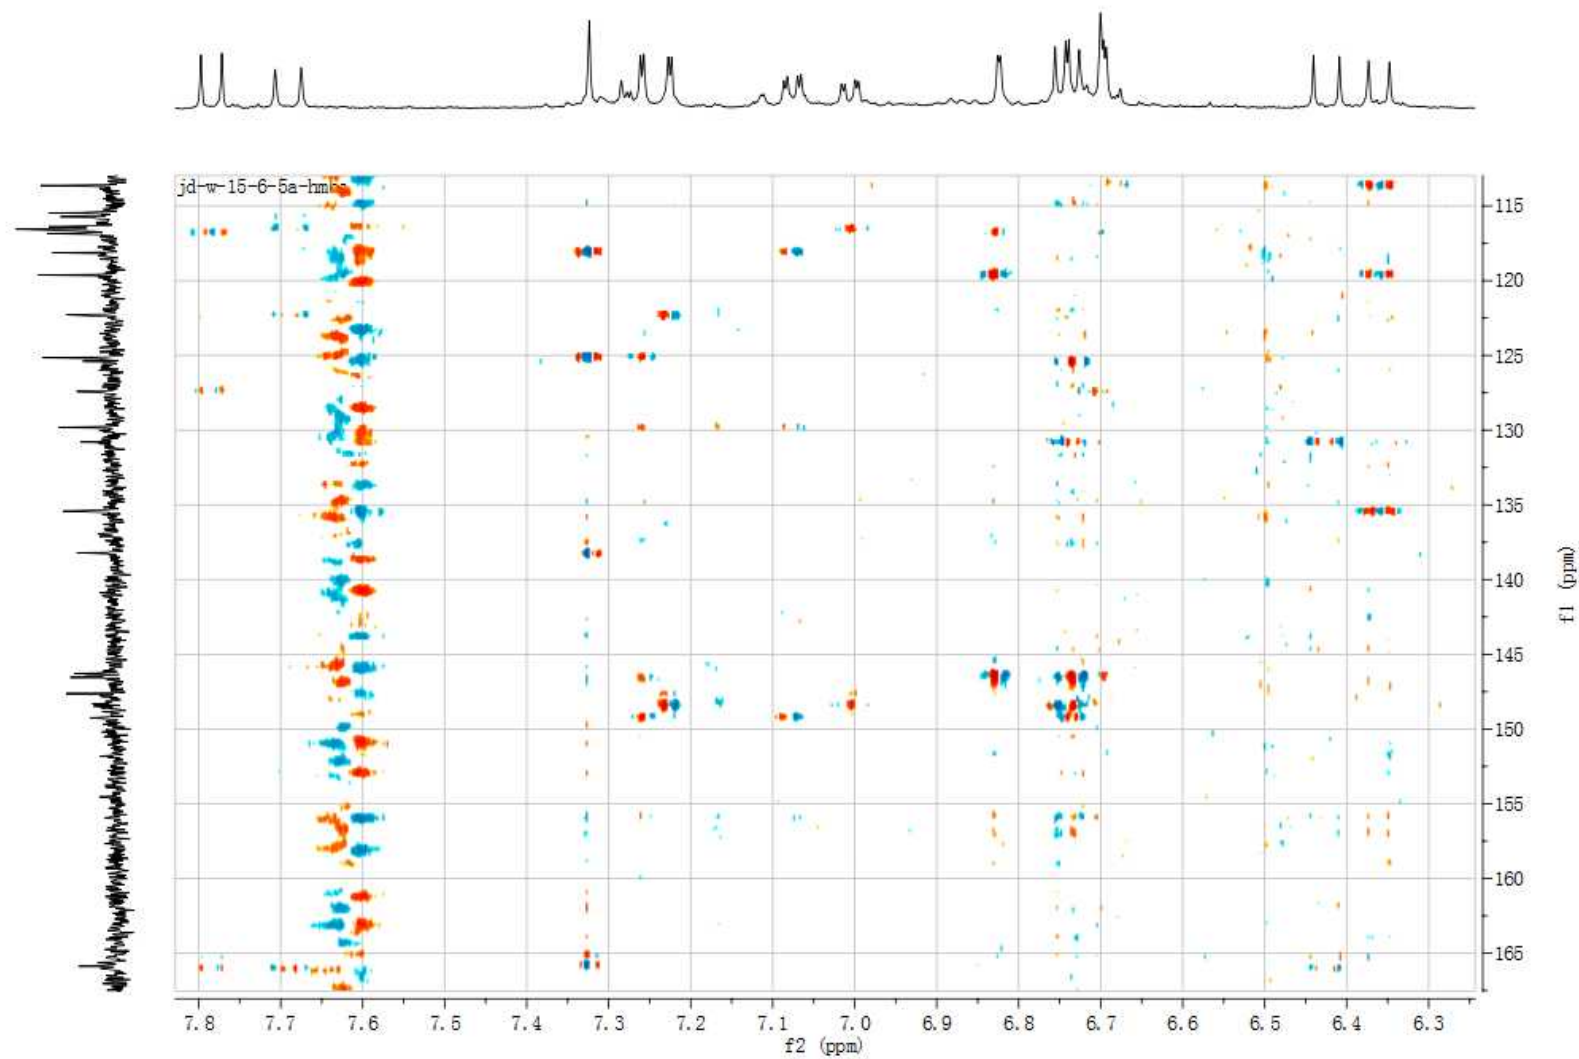

Figure S13 ROESY NMR spectrum of Sebestenoid B (2) (MeOH- $d_4$ , 500 MHz)

pulse sequence: RUCST  
Solvent: cd30o  
Temp. 22.0 °C / 295.1 K  
Operator: vnmr1  
File: jd-w-15-6-5a-roesy  
IMAVA-500 "localho" "  
  
Mixing 0.500 sec  
Acq. time 0.500 sec  
Width 2514.7 Hz  
2D Width 2514.7 Hz  
32 repetitions  
2 x 256 increments  
OBSERVE H1, 500.1133918 MHz  
DATA PROCESSING  
Gauss apodization 0.094 sec  
F1 DATA PROCESSING  
Gauss apodization 0.094 sec  
FT size 2048 x 2048  
Total time 9 hr, 23 min, 14 sec

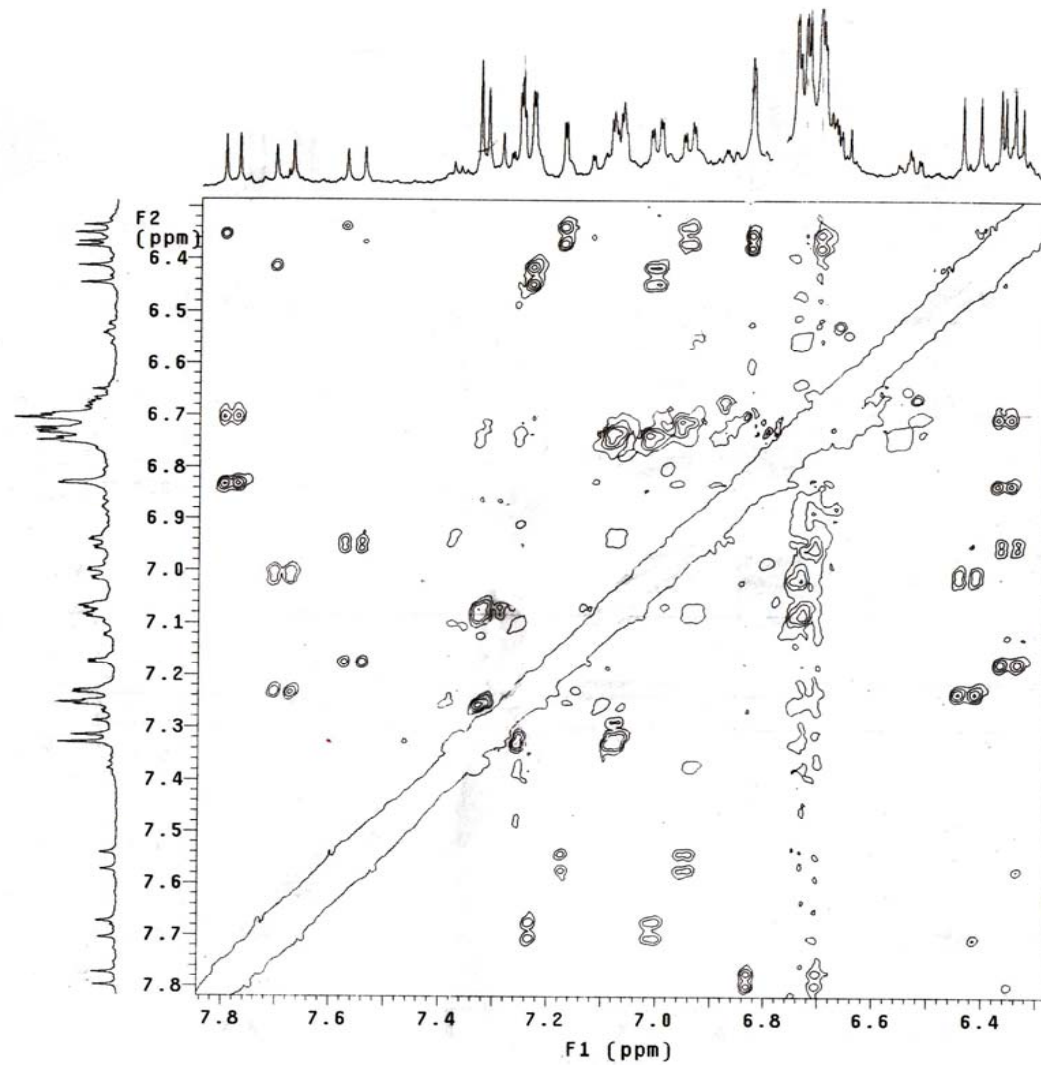

jd-w-17-8-4-1h

Figure S14  $^1\text{H-NMR}$  spectrum of Sebestenoid C (**3**) ( $\text{MeOH-}d_4$ , 500 MHz)

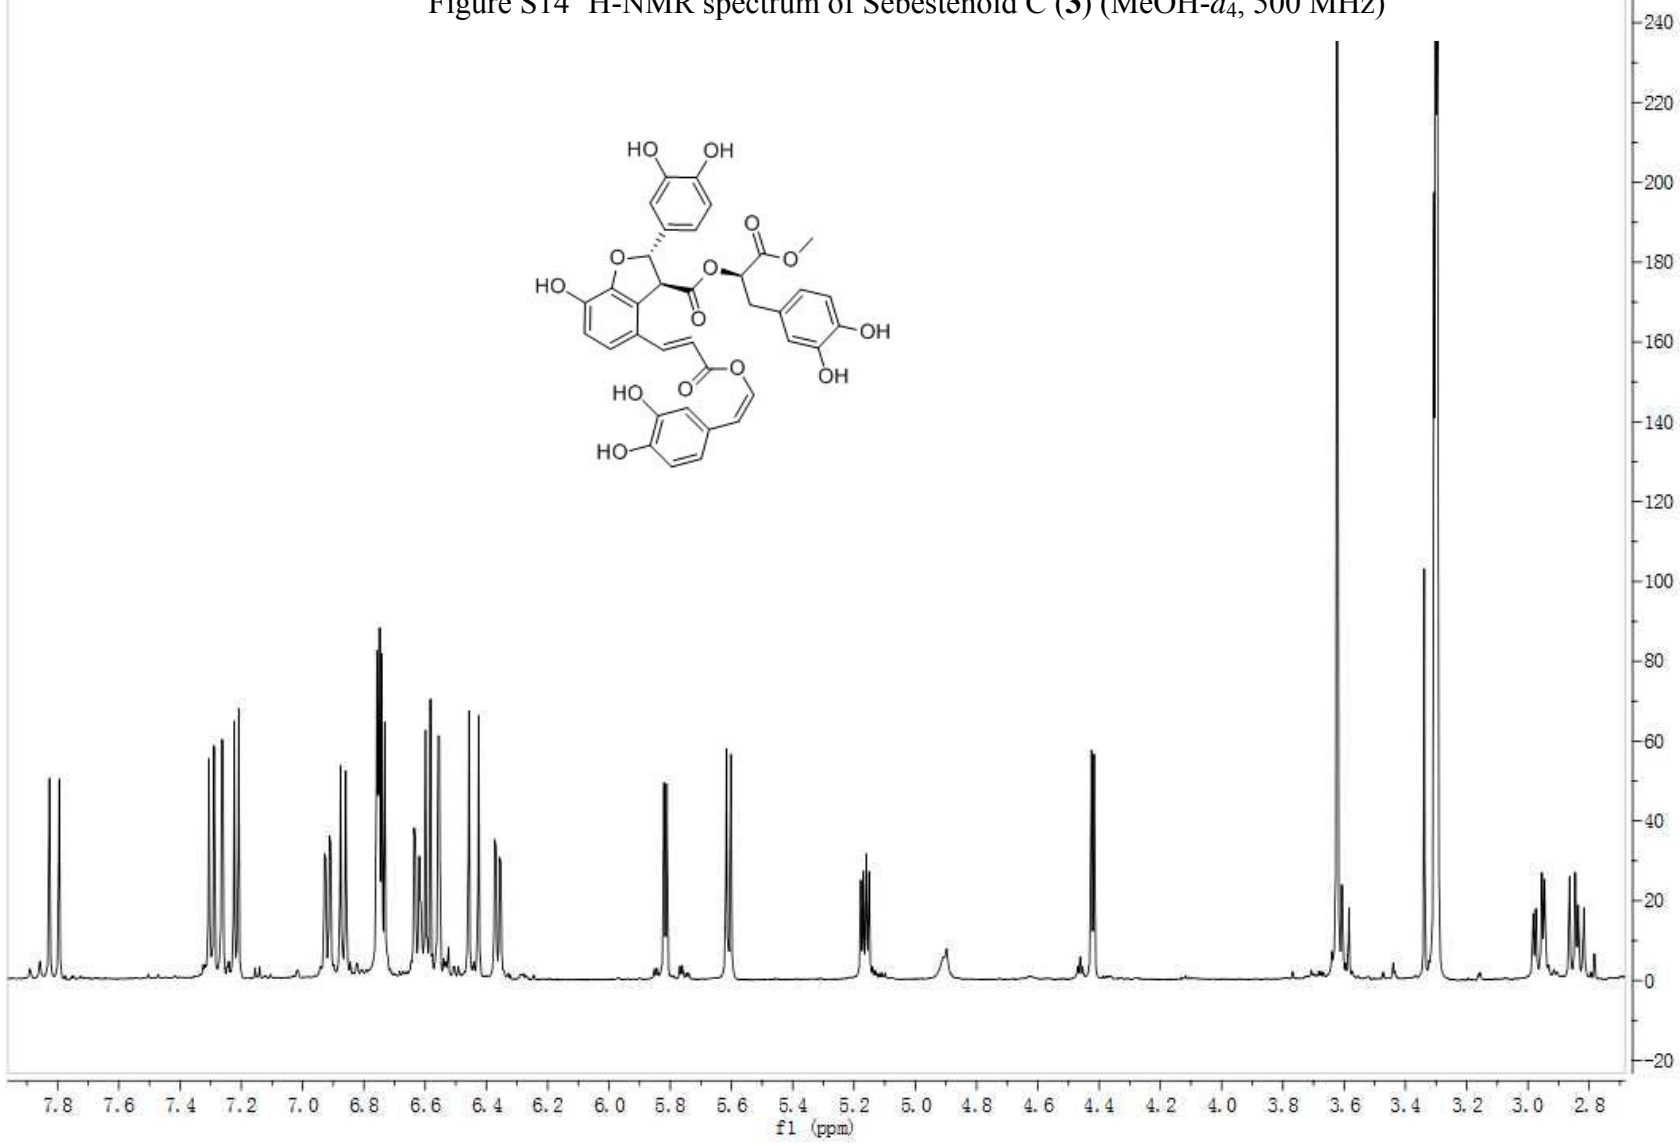

jd-w-17-8-4-13c

Figure S15  $^{13}\text{C}$ -NMR spectrum of Sebestenoid C (**3**) (MeOH- $d_4$ , 125 MHz)

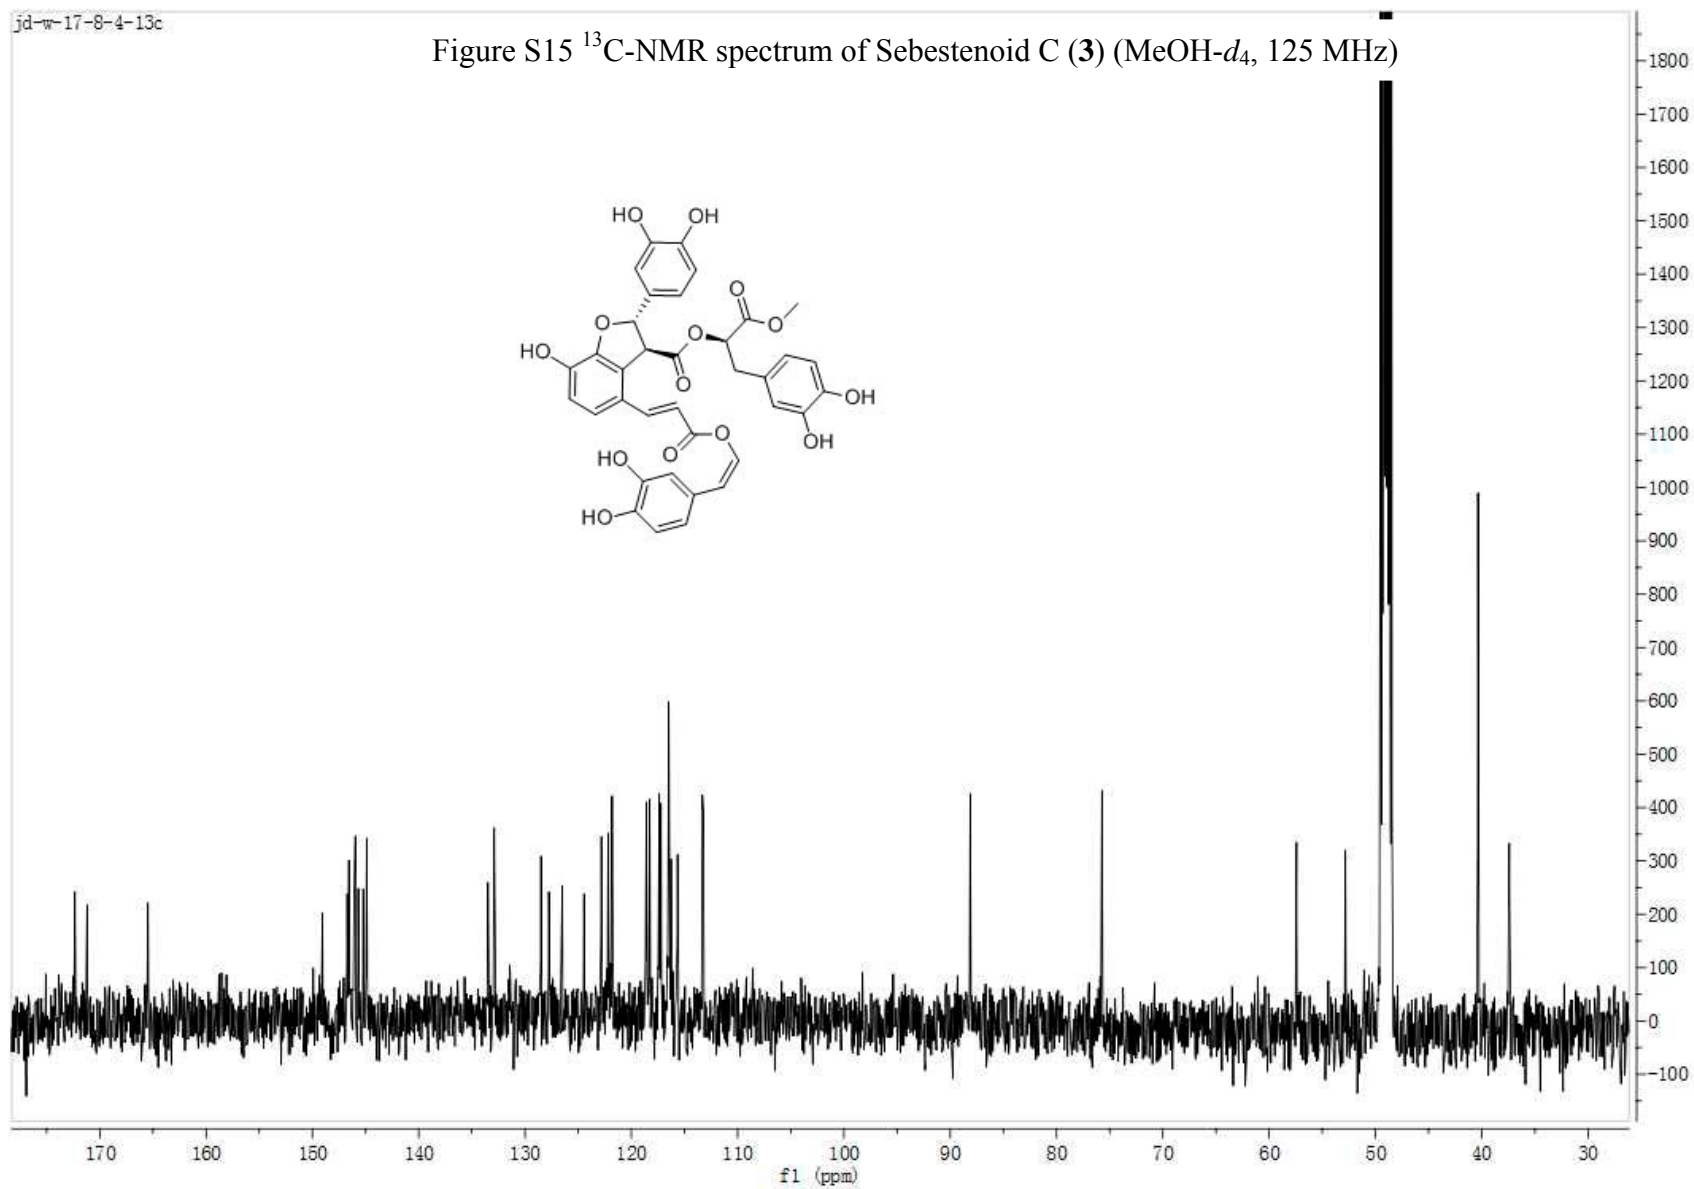

Figure S16 COSY NMR spectrum of Sebestenoid C (**3**) (MeOH-*d*<sub>4</sub>, 500 MHz)

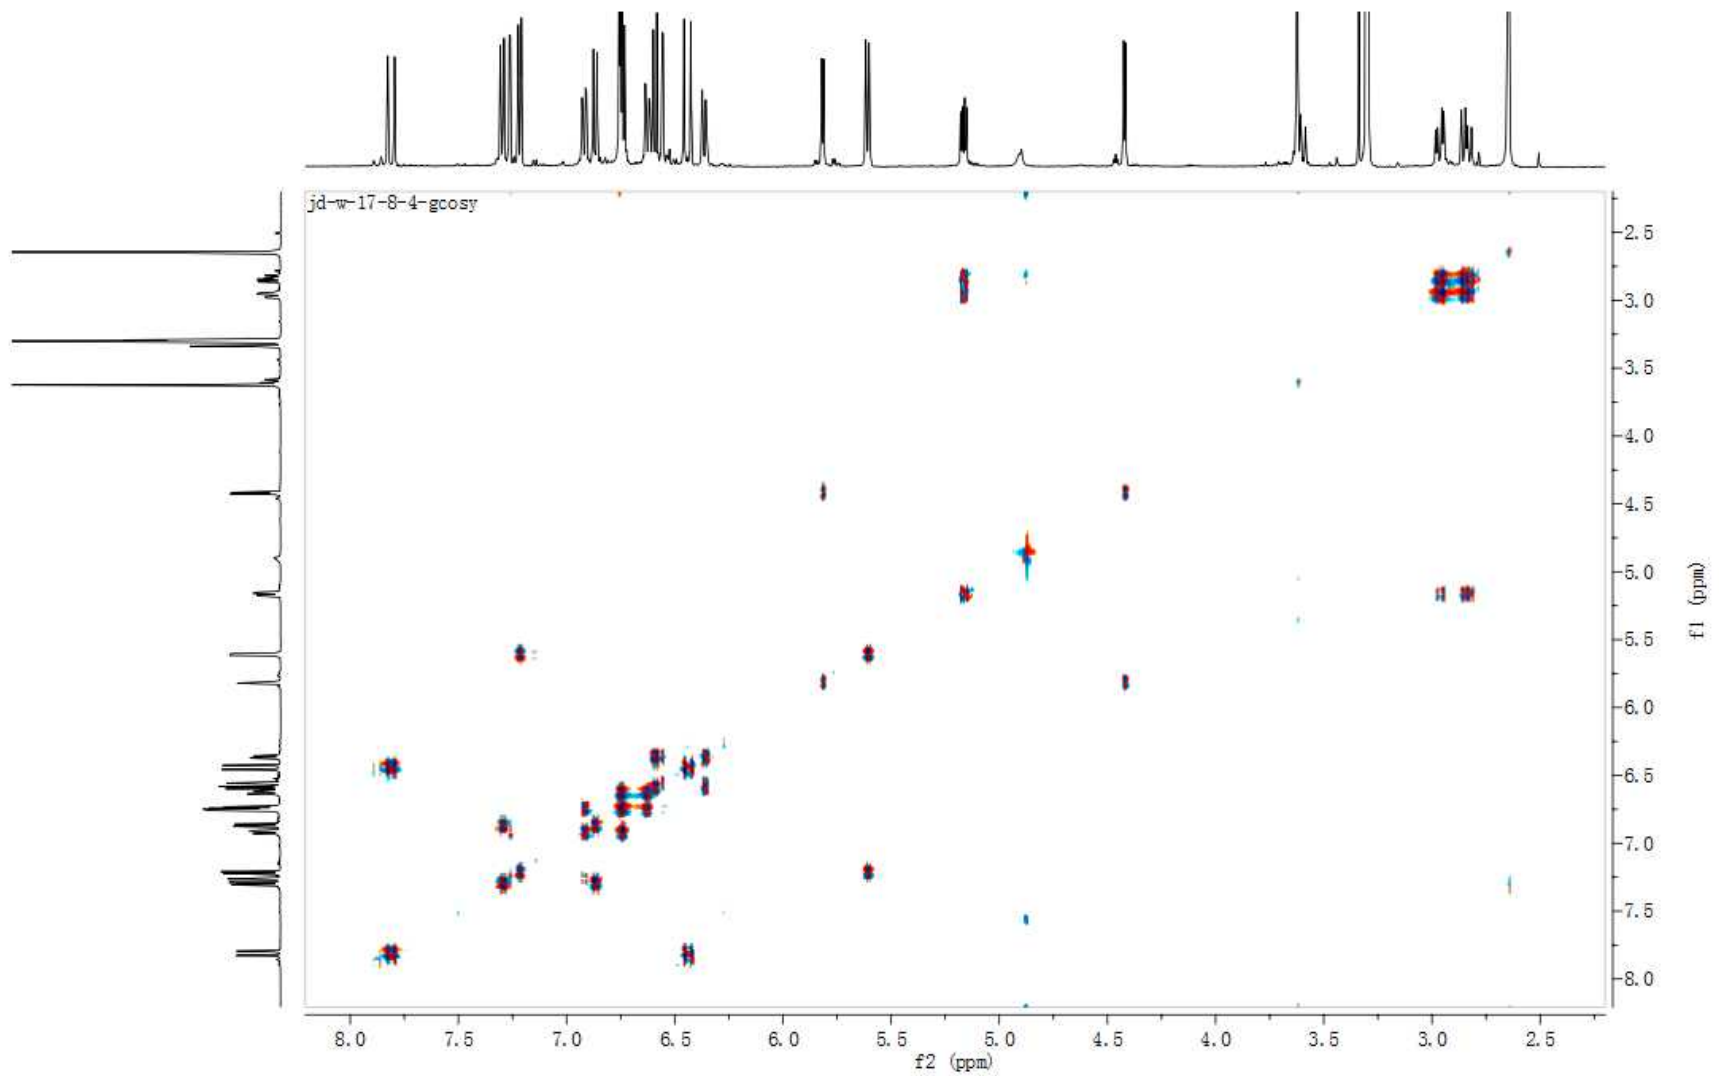

Figure S17 HSQC NMR spectrum of Sebestenoid C (**3**) (MeOH- $d_4$ , 500 MHz)

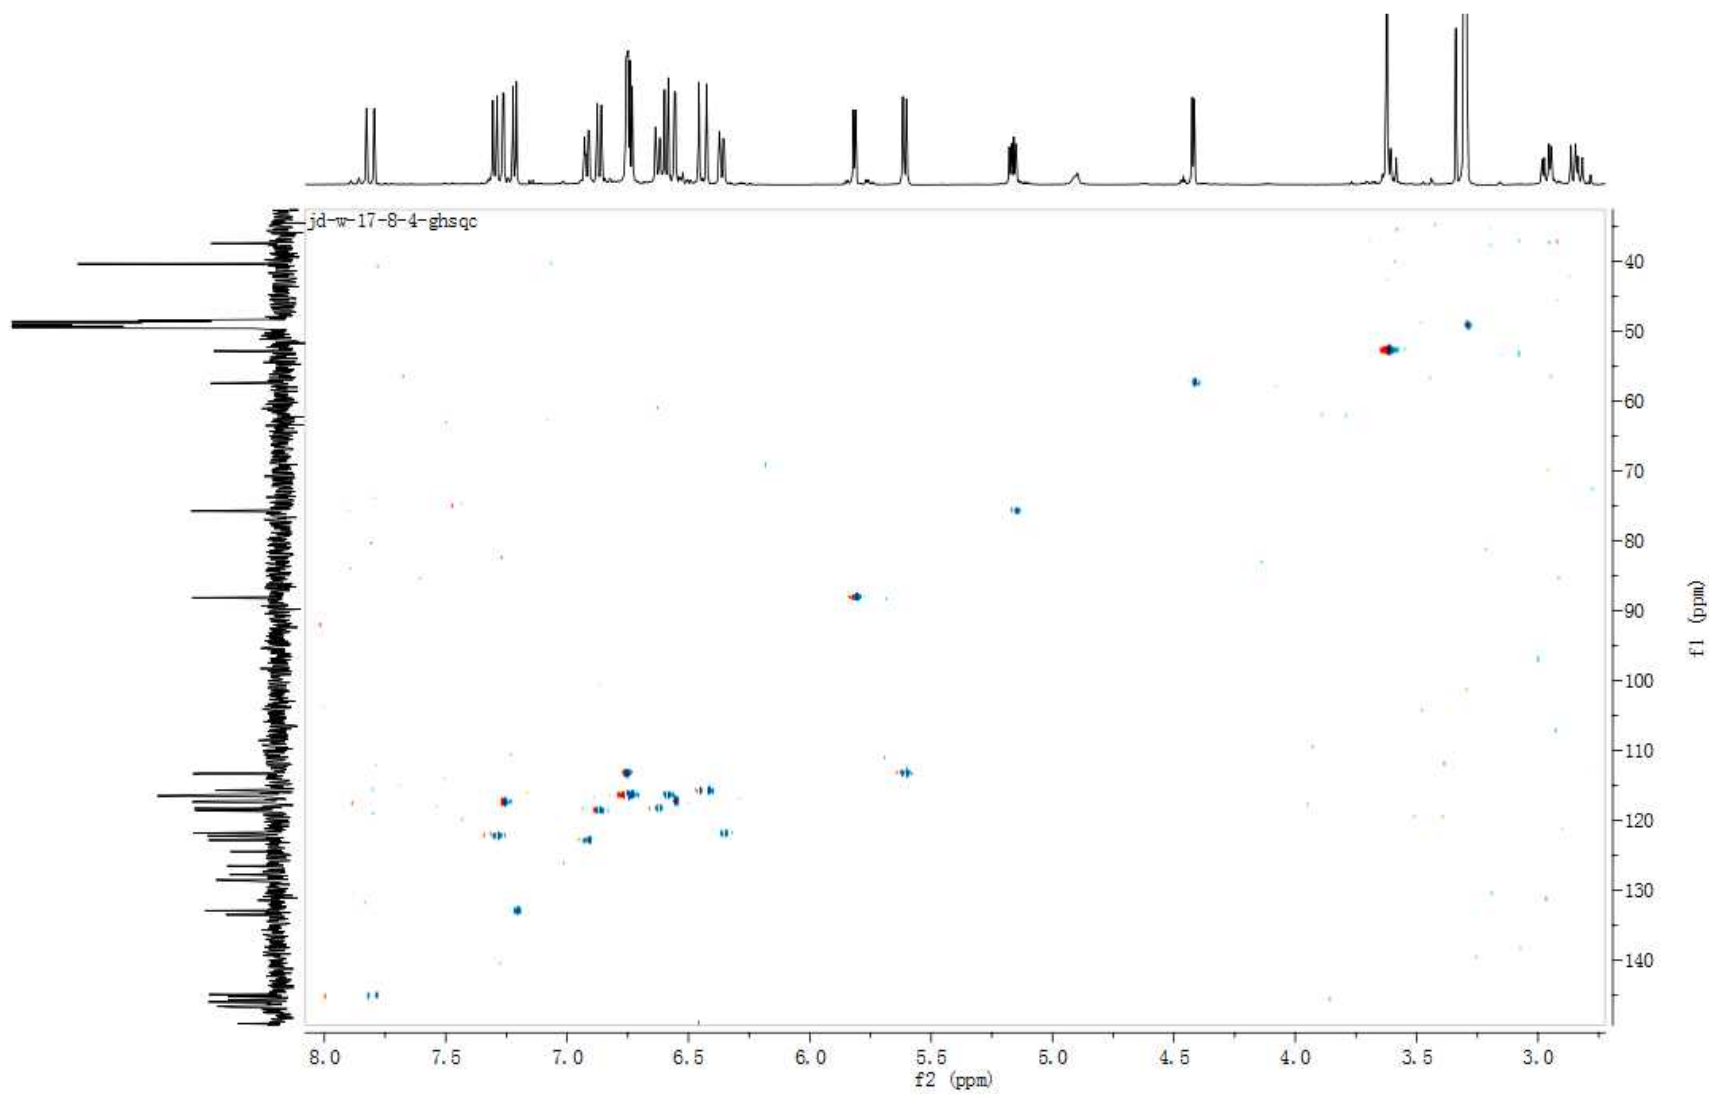

Figure S18 Expansion of HSQC NMR spectrum of Sebestenoid C (**3**) (MeOH-*d*<sub>4</sub>, 500 MHz)

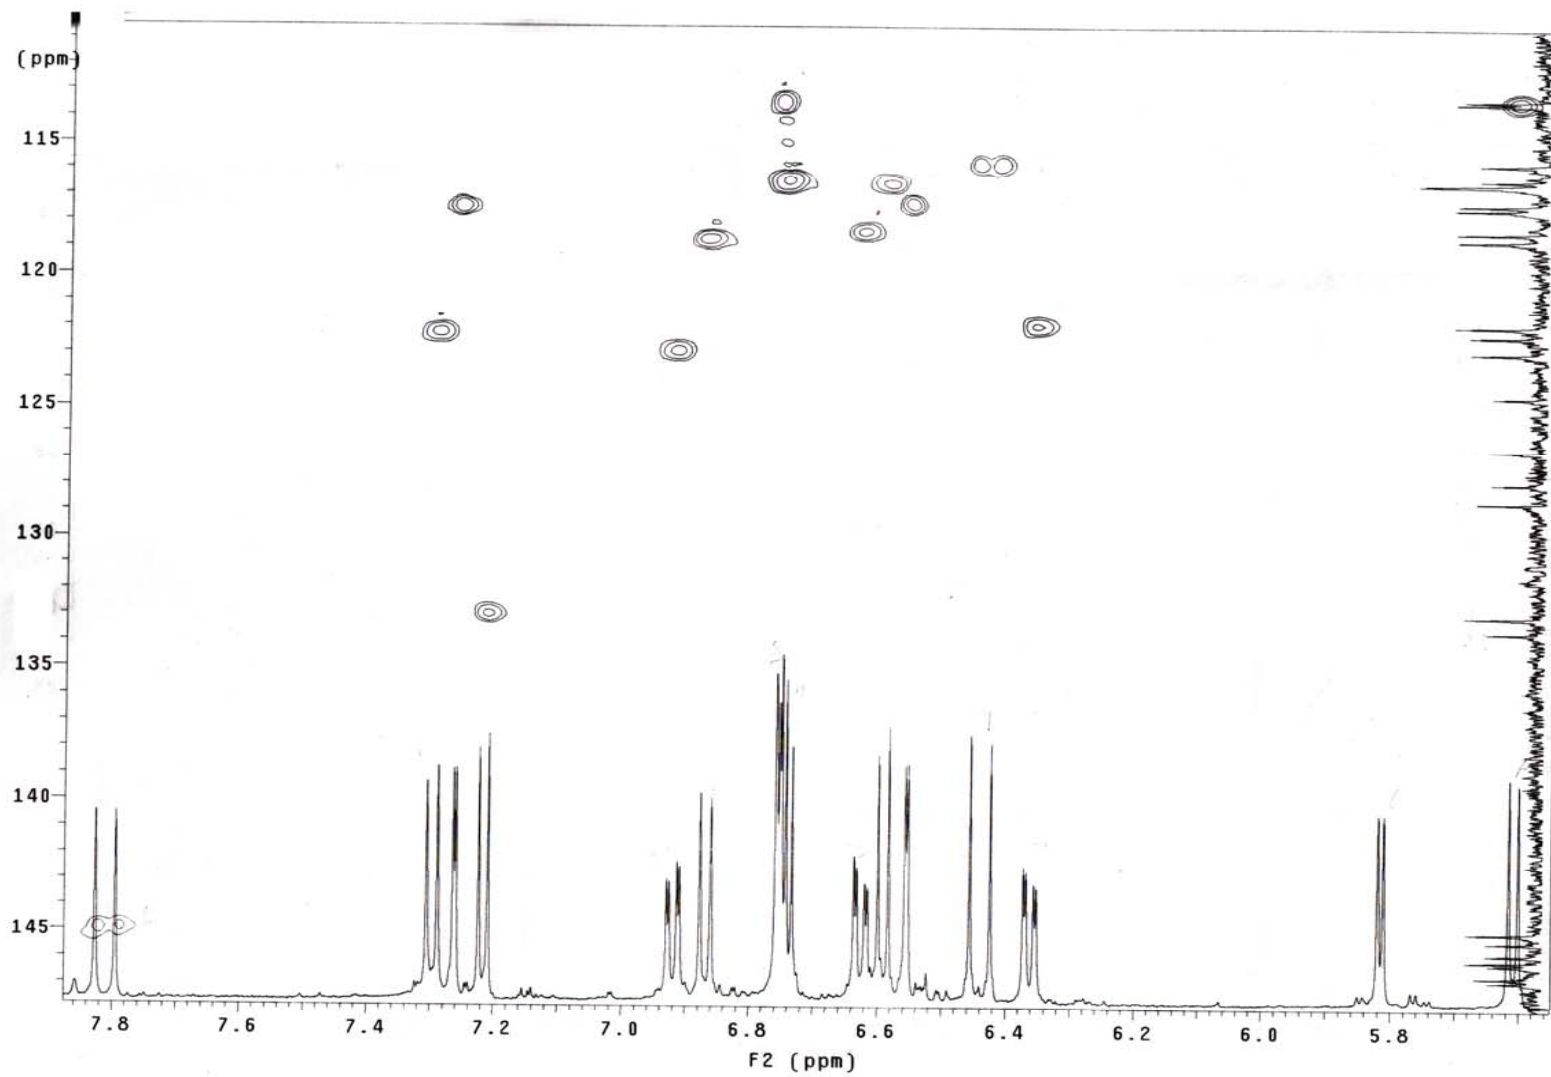



Figure S19 HMBC NMR spectrum of Sebestenoid C (**3**) (MeOH-*d*<sub>4</sub>, 500 MHz)

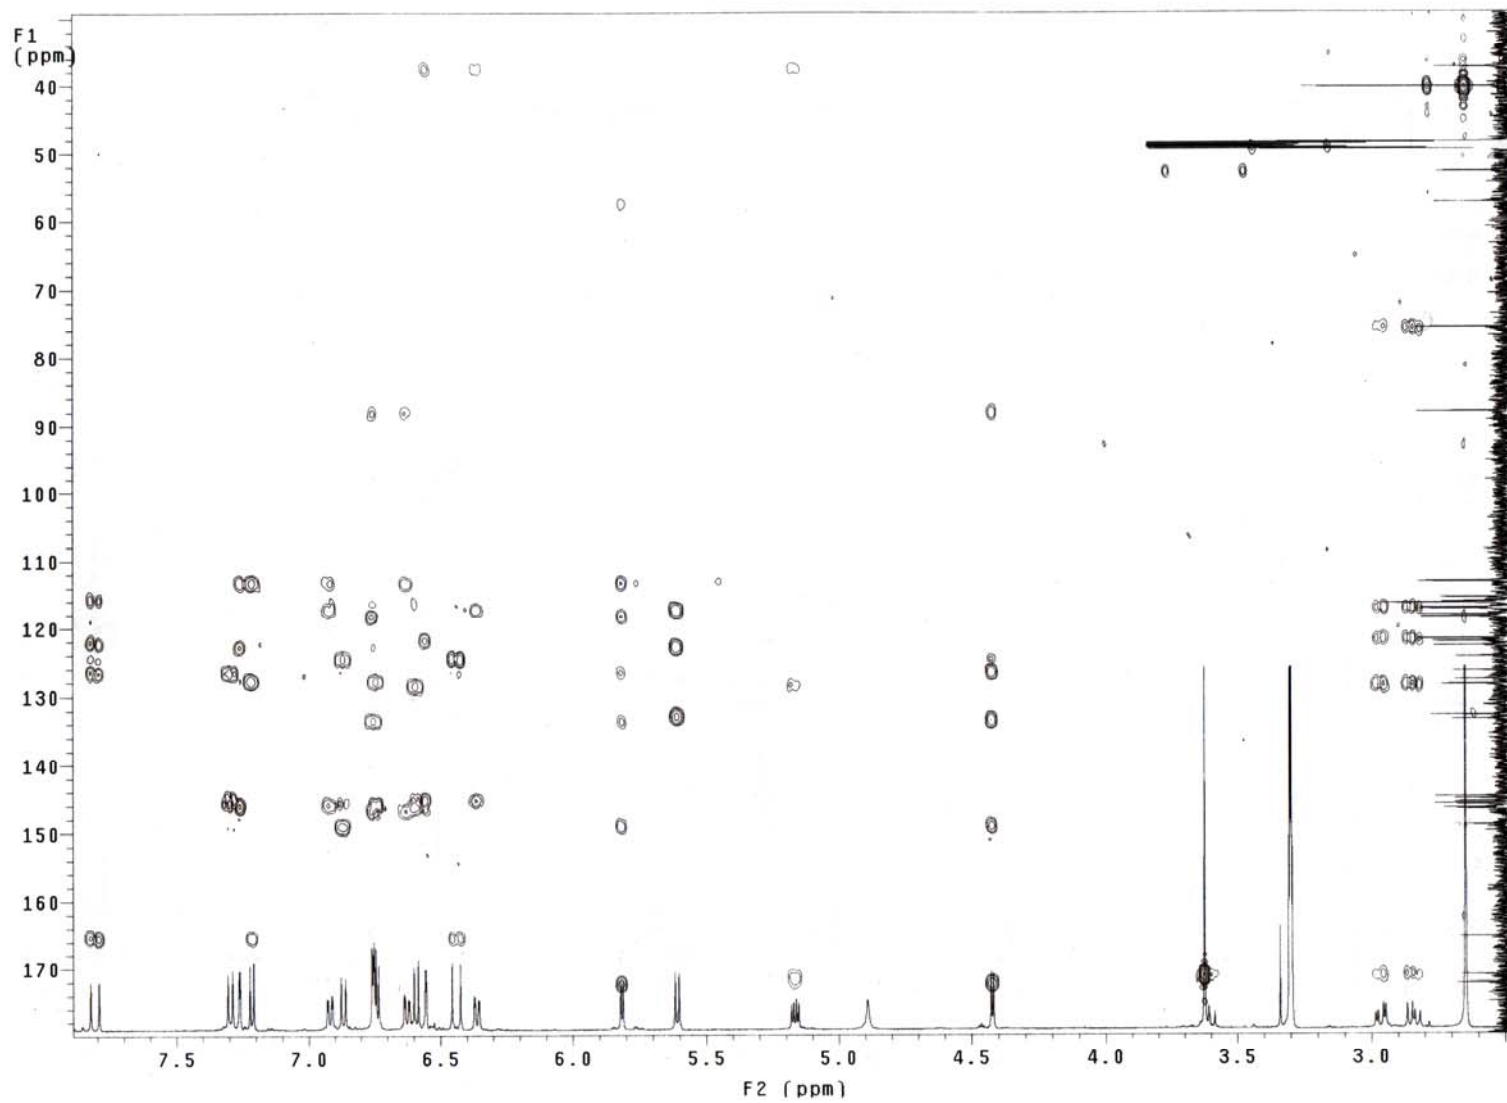

Figure S20 ROESY NMR spectrum of Sebestenoid C (**3**) (MeOH-*d*<sub>4</sub>, 500 MHz)

Pulse Sequence: ROESY  
Solvent: cd3od  
Temp. 22.0 C / 295.1 K  
Operator: vnmr1  
File: jd-w-17-8-4-roesy  
INOVA-500 "localhost"

Mixing 0.500 sec  
Acq. time 0.500 sec  
Width 3004.7 Hz  
2D Width 3004.7 Hz  
16 repetitions  
2 x 256 increments  
OBSERVE H1, 500.1133918 MHz  
DATA PROCESSING  
Gauss apodization 0.079 sec  
F1 DATA PROCESSING  
Gauss apodization 0.079 sec  
FT size 2048 x 2048  
Total time 4 hr, 40 min, 37 sec

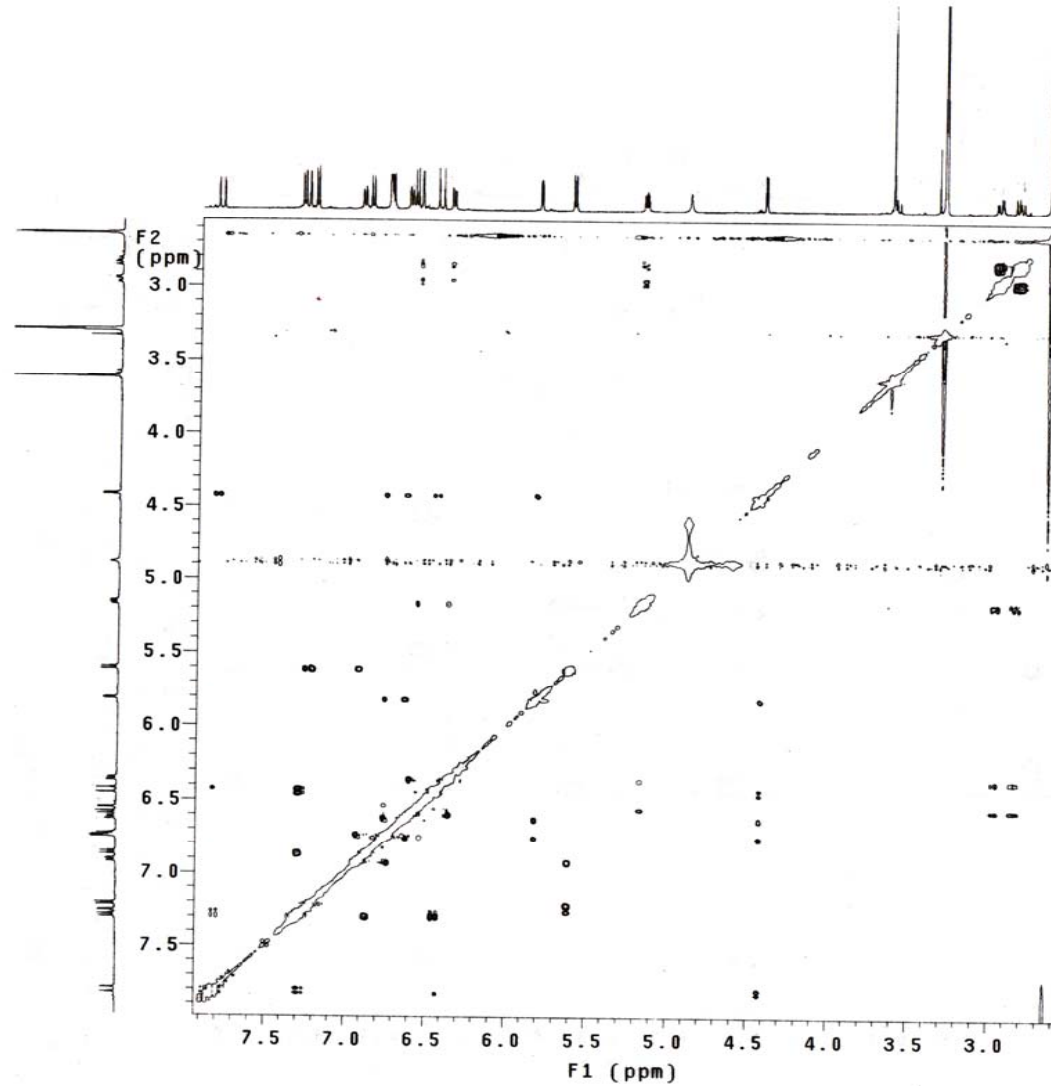

jd-w-17-8-3-1h

Figure S21  $^1\text{H-NMR}$  spectrum of Sebestenoid D (**4**) ( $\text{MeOH-}d_4$ , 500 MHz)

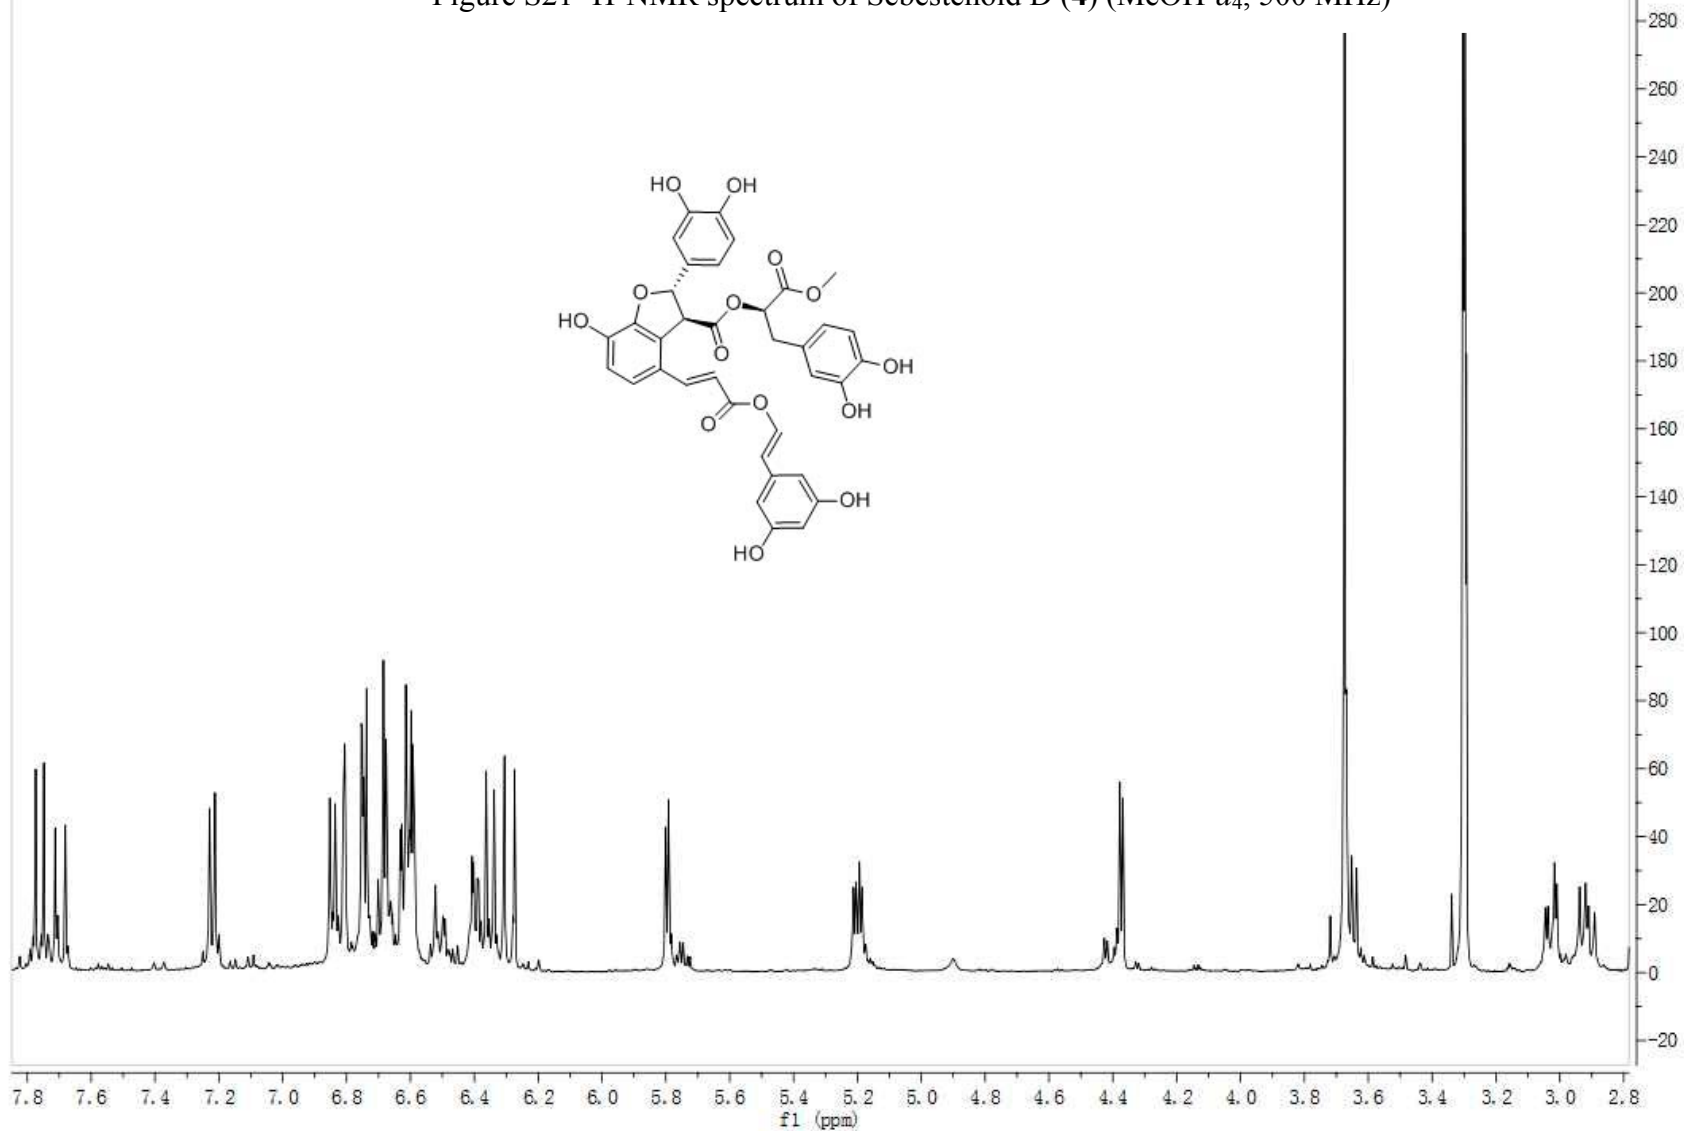

jd-w-17-8-3-13c

Figure S22  $^{13}\text{C}$ -NMR spectrum of Sebestenoid D (**4**) (MeOH- $d_4$ , 125 MHz)

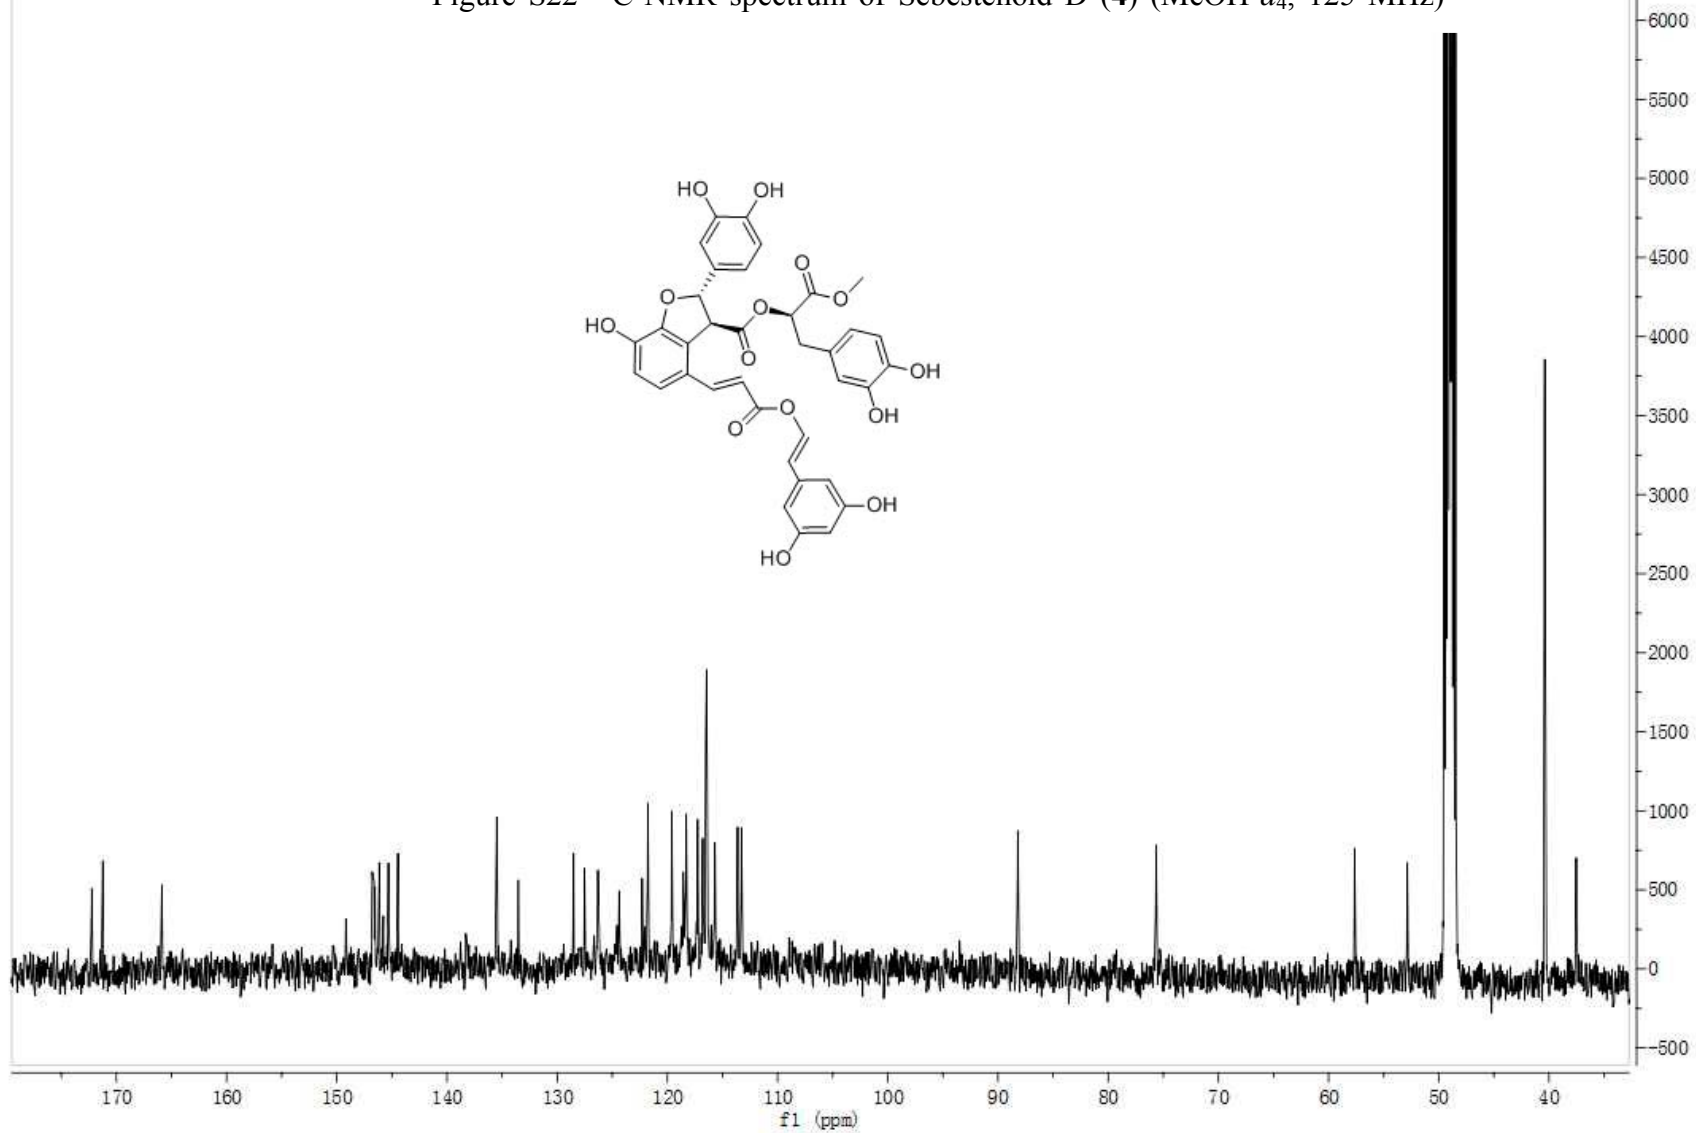

Figure S23 COSY NMR spectrum of Sebestenoid D (4) (MeOH-*d*<sub>4</sub>, 500 MHz)

Pulse Sequence: gDQCOSY  
Solvent: cd3od  
Ambient temperature  
Operator: vnmr1  
File: jd-w-17-8-3-gcosy  
INOVA-500 "localhost"  
  
Relax. delay 1.000 sec  
Acq. time 0.500 sec  
Width 2901.5 Hz  
2D Width 2901.5 Hz  
8 repetitions  
2 x 128 increments  
OBSERVE H1, 500.1133918 MHz  
DATA PROCESSING  
Sq. sine bell 0.132 sec  
Shifted by -0.088 sec  
F1 DATA PROCESSING  
Sq. sine bell 0.037 sec  
Shifted by -0.025 sec  
FT size 2048 x 2048  
Total time 52 min, 39 sec

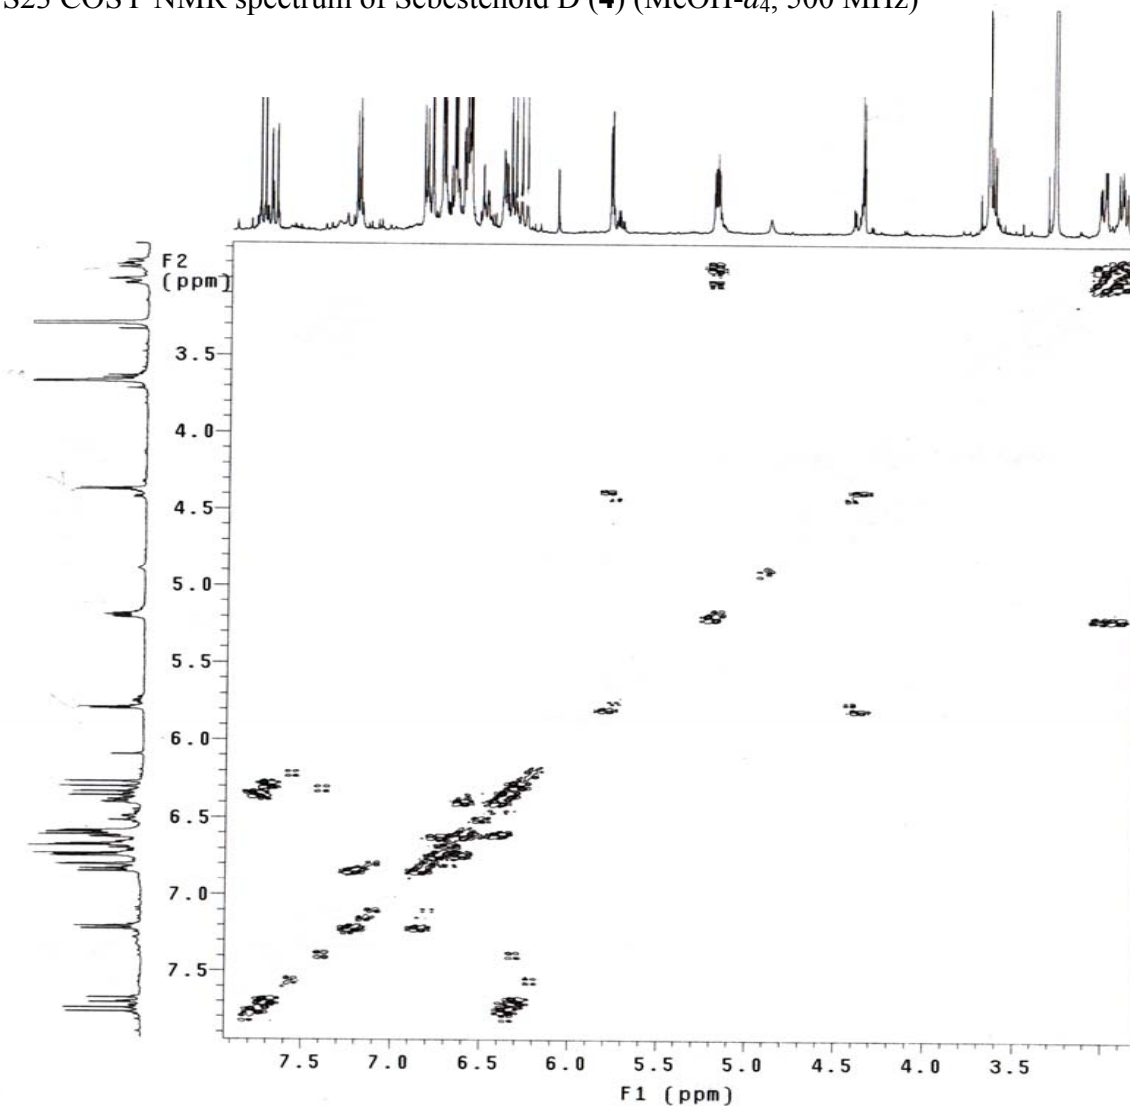

Figure S24 HSQC NMR spectrum of Sebestenoid D (**4**) (MeOH-*d*<sub>4</sub>, 500 MHz)

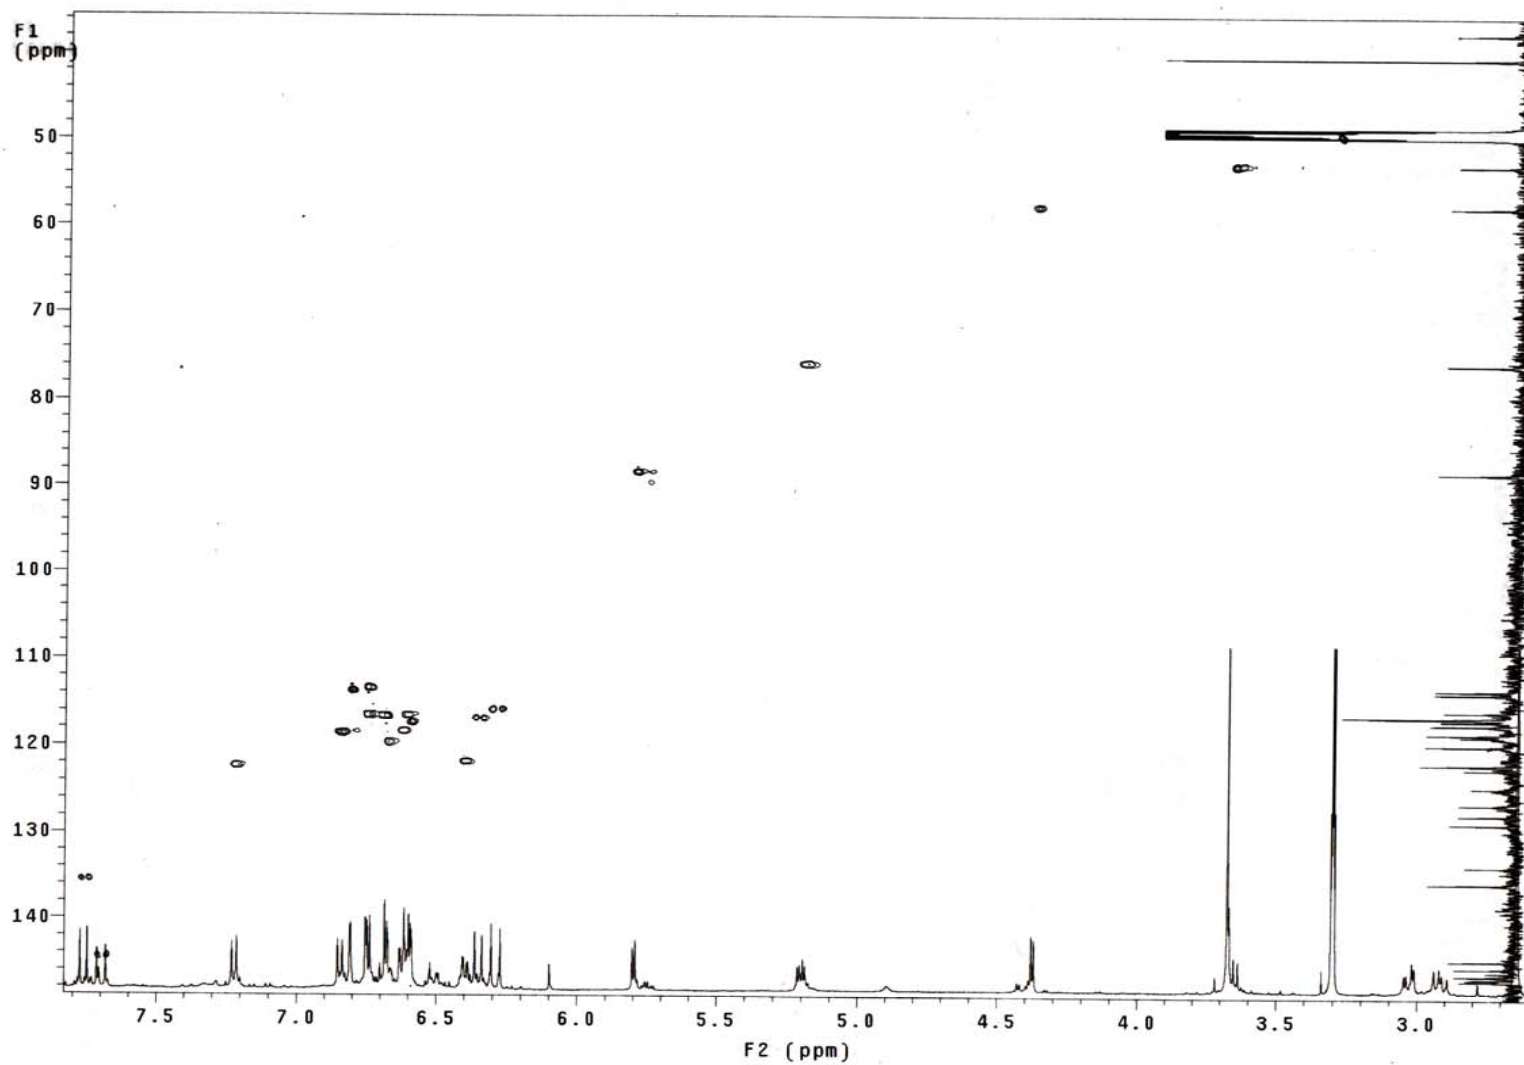

Figure S25 HMBC NMR spectrum of Sebestenoid D (4) (MeOH-*d*<sub>4</sub>, 500 MHz)

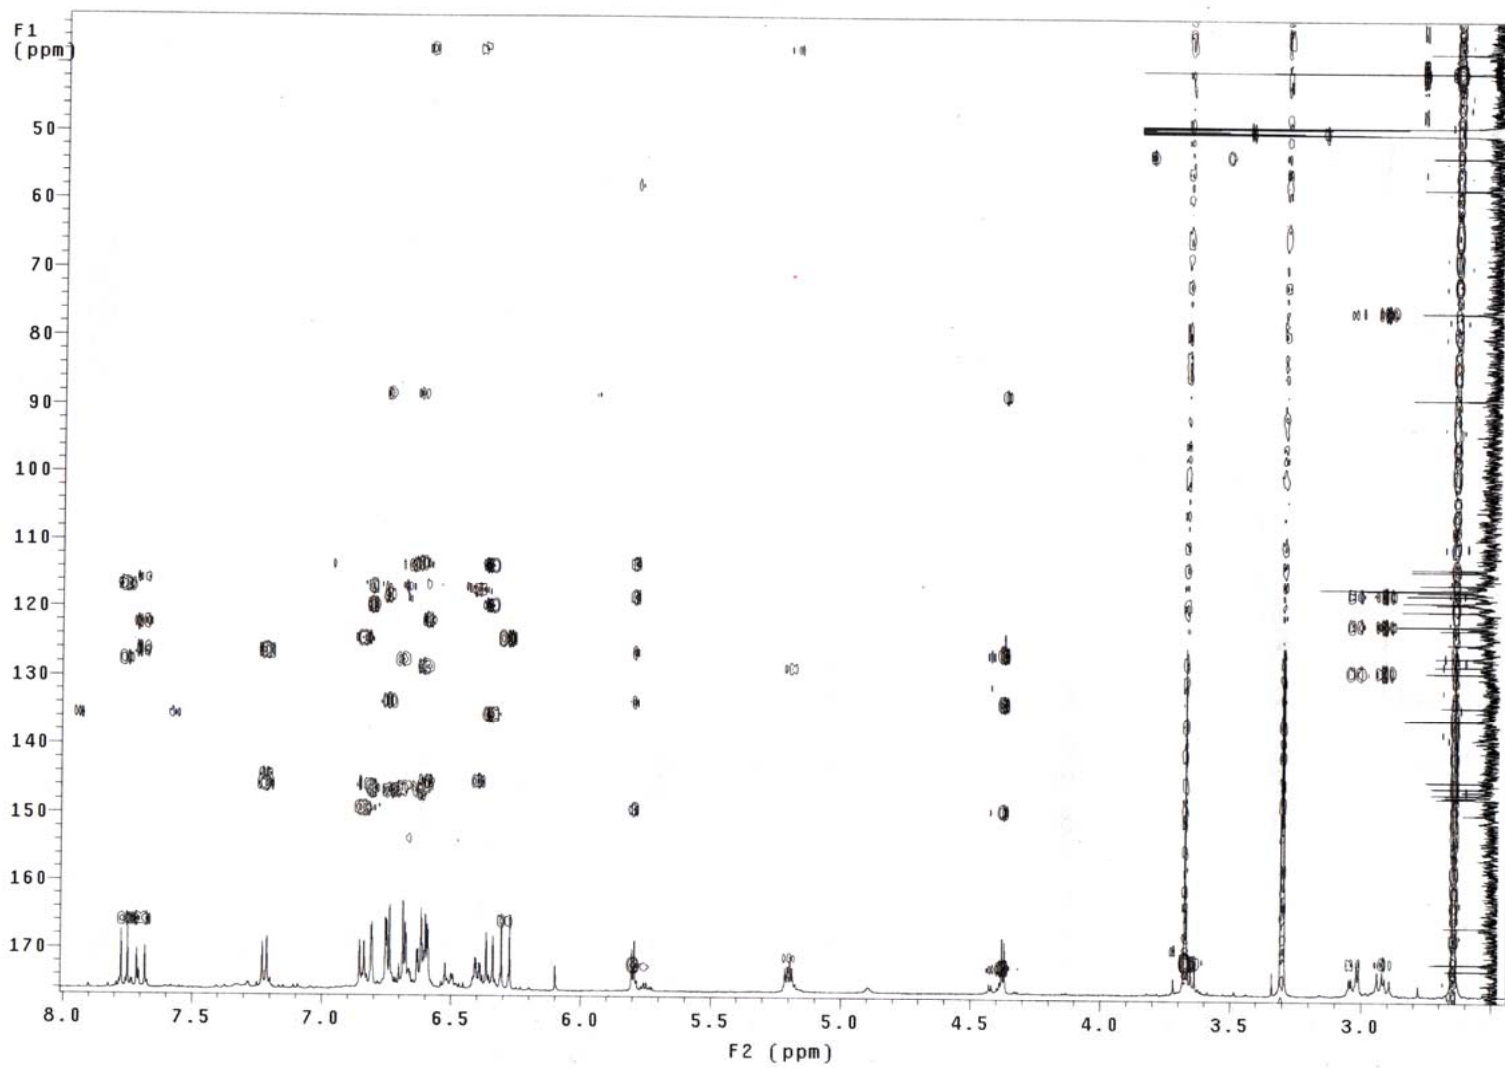

Figure S26 ROESY NMR spectrum of Sebestenoid D (4) (MeOH- $d_4$ , 500 MHz)

Pulse Sequence: ROESY  
Solvent: cd3od  
Ambient temperature  
Operator: vnmr1  
File: jd-w-17-8-3-roesy  
INOVA-500 "localhost"  
  
Mixing 0.500 sec  
Acq. time 0.500 sec  
Width 2901.5 Hz  
2D Width 2901.5 Hz  
16 repetitions  
2 x 256 increments  
OBSERVE H1, 500.1133918 MHz  
DATA PROCESSING  
Gauss apodization 0.082 sec  
F1 DATA PROCESSING  
Gauss apodization 0.081 sec  
FT size 2048 x 2048  
Total time 4 hr, 40 min, 51 sec

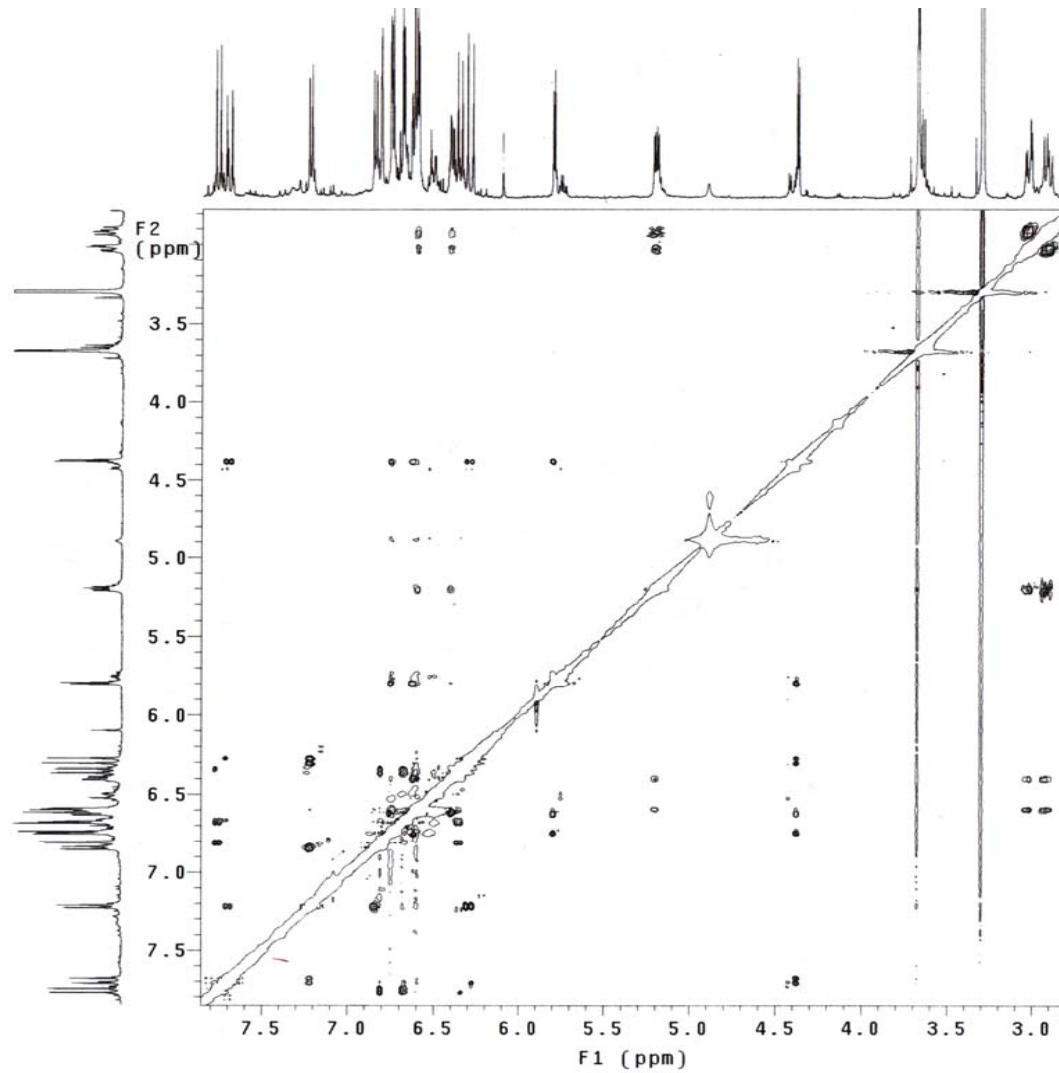

Supplement: NIHMS241249-supplement-01.pdf [file NIHMS241249-supplement-01.pdf]
